# Supplementary material for: Intratumoral generation of photothermal gold nanoparticles through a vectorized biomineralization of ionic gold
Source: PubMed Central journal article supplement (PMC7483505; doi:10.1038/s41467-020-17595-6), 2020-09-10
Supplement: 41467_2020_17595_MOESM1_ESM.pdf [file 41467_2020_17595_MOESM1_ESM.pdf]

## Supplementary Information

### Intratumoral Generation of Photothermal Gold Nanoparticles through a Vectorized Biom mineralization of Ionic Gold

Aaron S. Schwartz-Duval<sup>1,2,3</sup>, Christian J. Konopka<sup>1,2</sup>, Parikshit Moitra<sup>4,5,6</sup>, Enrique A. Daza<sup>1,2,3</sup>, Indrajit Srivastava<sup>1,2,3</sup>, Elyse V. Johnson<sup>7</sup>, Taylor L. Kampert<sup>1,2,3</sup>, Stanley Fajn<sup>1,2</sup>, Anand Haran<sup>1,2</sup>, Lawrence W. Dobrucki<sup>1,2</sup>, and Dipanjan Pan<sup>1,2,3,4,5,6,\*</sup>

<sup>1</sup> Department of Bioengineering, University of Illinois, Urbana-Champaign, Urbana, 61801, USA

<sup>2</sup> Beckman Institute, University of Illinois, Urbana-Champaign, Urbana, 61801, USA

<sup>3</sup> Biomedical Research Center, Carle Foundation Hospital, Urbana, IL, USA

<sup>4</sup> Department of Diagnostic Radiology and Nuclear Medicine, University of Maryland Baltimore School of Medicine, Baltimore, Maryland, 21201, United States

<sup>5</sup> Department of Pediatrics, Center for Blood Oxygen Transport and Hemostasis, University of Maryland Baltimore School of Medicine, Health Sciences Research Facility III, 670 W Baltimore St., Baltimore, Maryland 21201, United States

<sup>6</sup> Department of Chemical, Biochemical and Environmental Engineering, University of Maryland Baltimore County, Interdisciplinary Health Sciences Facility, 1000 Hilltop Circle Baltimore, Baltimore, Maryland 21250, United States

<sup>7</sup> Cytoviva inc., Auburn, 36830, USA

\*To whom correspondence should be addressed: Prof. Dipanjan Pan; E-mail:

[dipanjan@som.umaryland.edu](mailto:dipanjan@som.umaryland.edu)

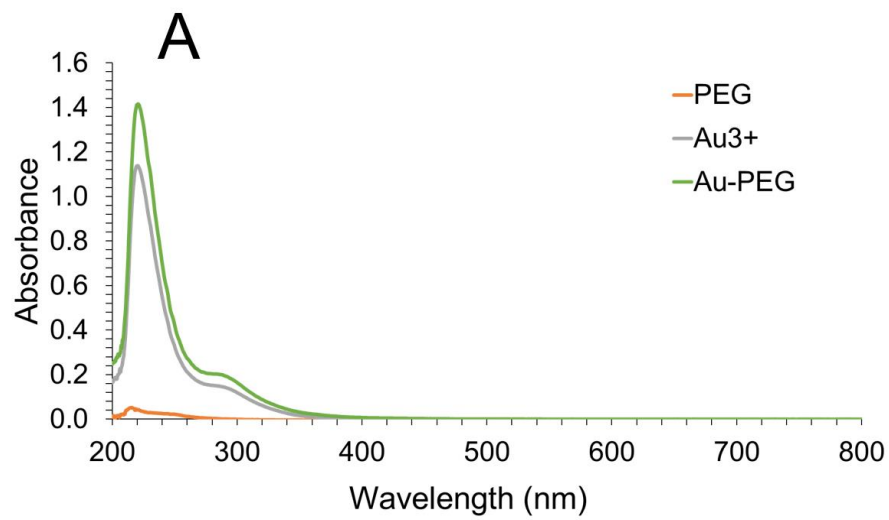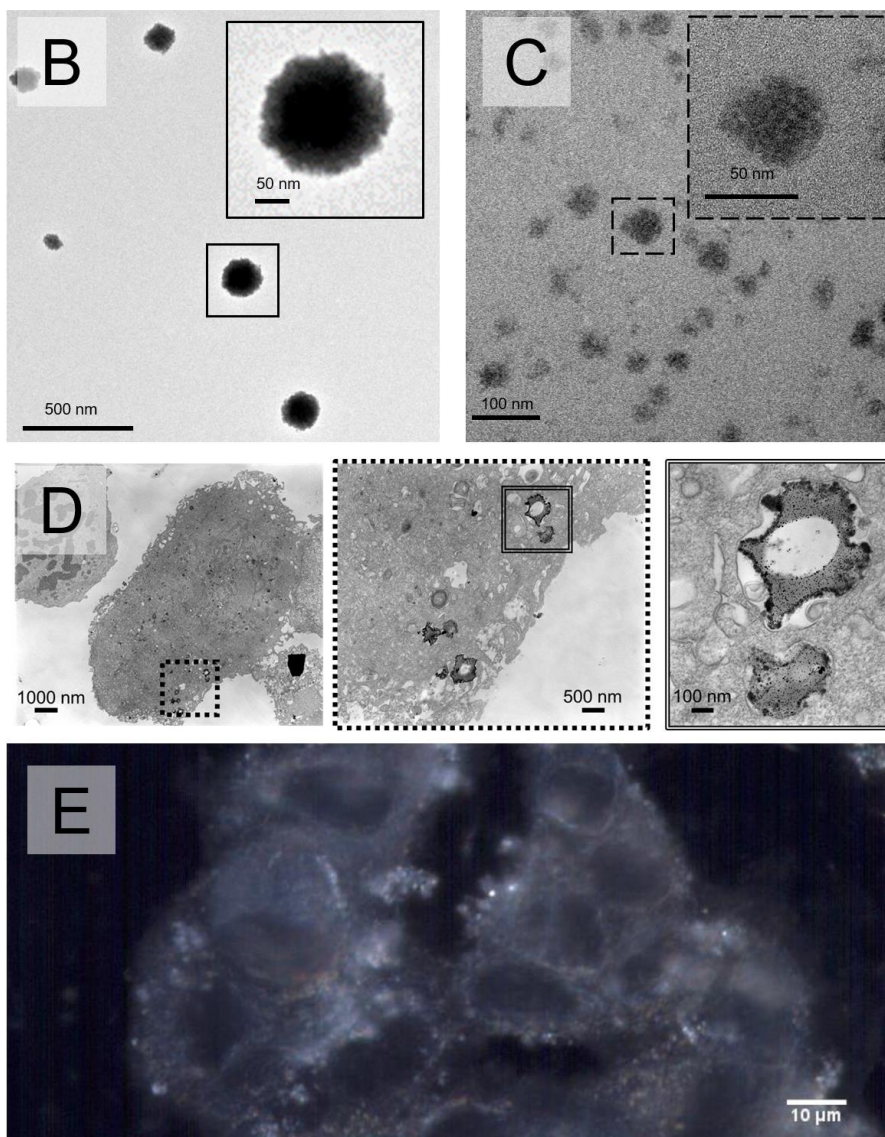

**Supplementary Figure 1.** Characterization of ionic Au-PEG cluster: (A) UV-Vis absorbance spectra of ionic Au-PEG clusters (200-800 nm) as well as its individual components at identical

concentrations. TEM images from the extracted solution of ionic Au-PEG treatments to cell culture plates with a magnification of Au-PEG cluster (B), and fresh cell culture media incubated with Au-PEG clusters (C). Additional TEM images of Au-PEG treated MCF-7 cells at various magnifications (D). Enhanced hyperspectral darkfield image of untreated MCF-7 cells used for negative filtering for Figure 2A and 2B (E).

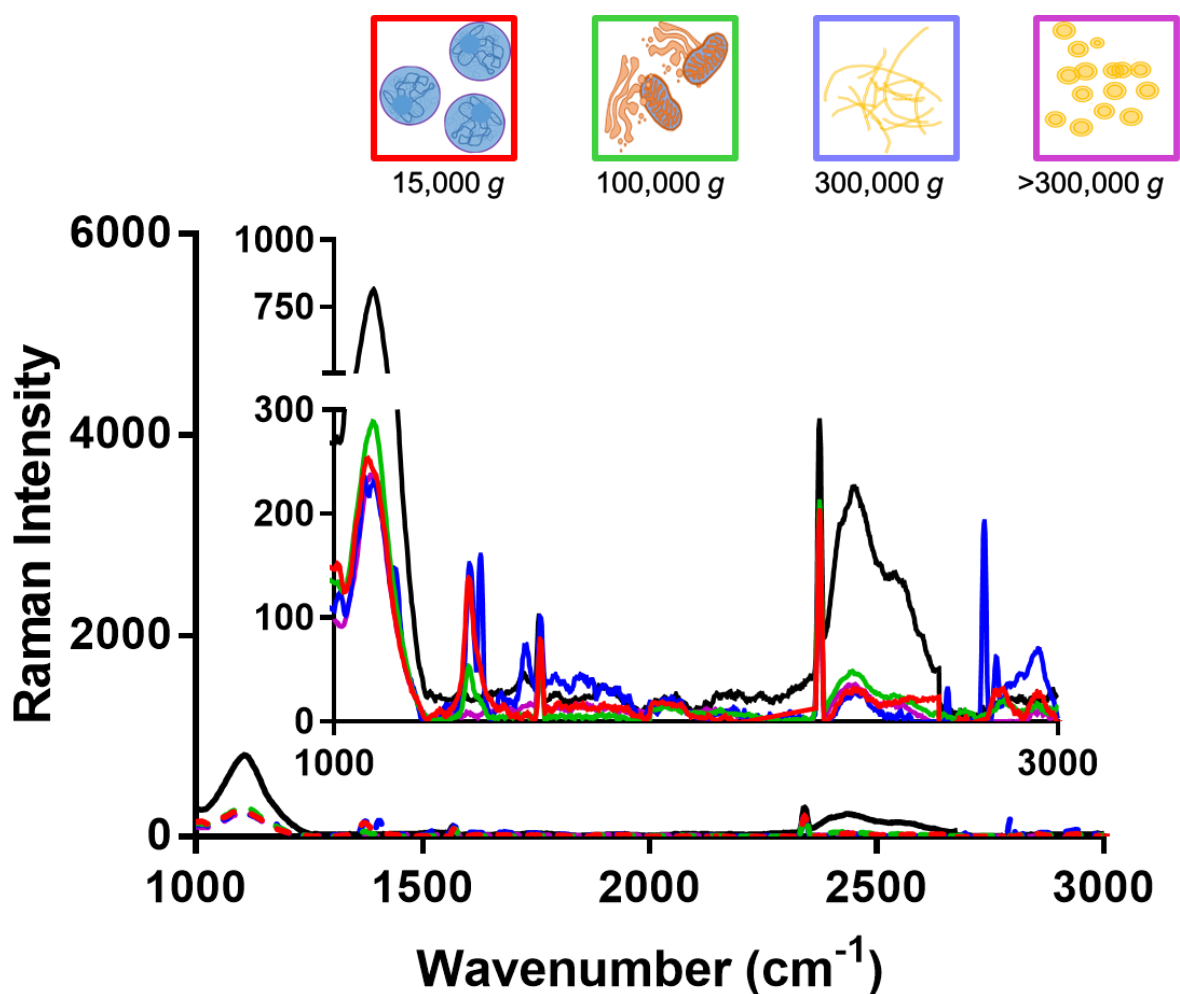

**Supplementary Figure 2.** Raman spectra of cellular fractions (all from MCF-7 cells): Nucleus and large organelles, 15,000 g (Red); mitochondria, lysosomes, and other medium sized organelles, 100,000 g (Green); membrane fragments, 300,000 g (Blue); and highly soluble/cytosolic molecules (Violet), >300,000 g; and the glass slide without cell fractions (Black).

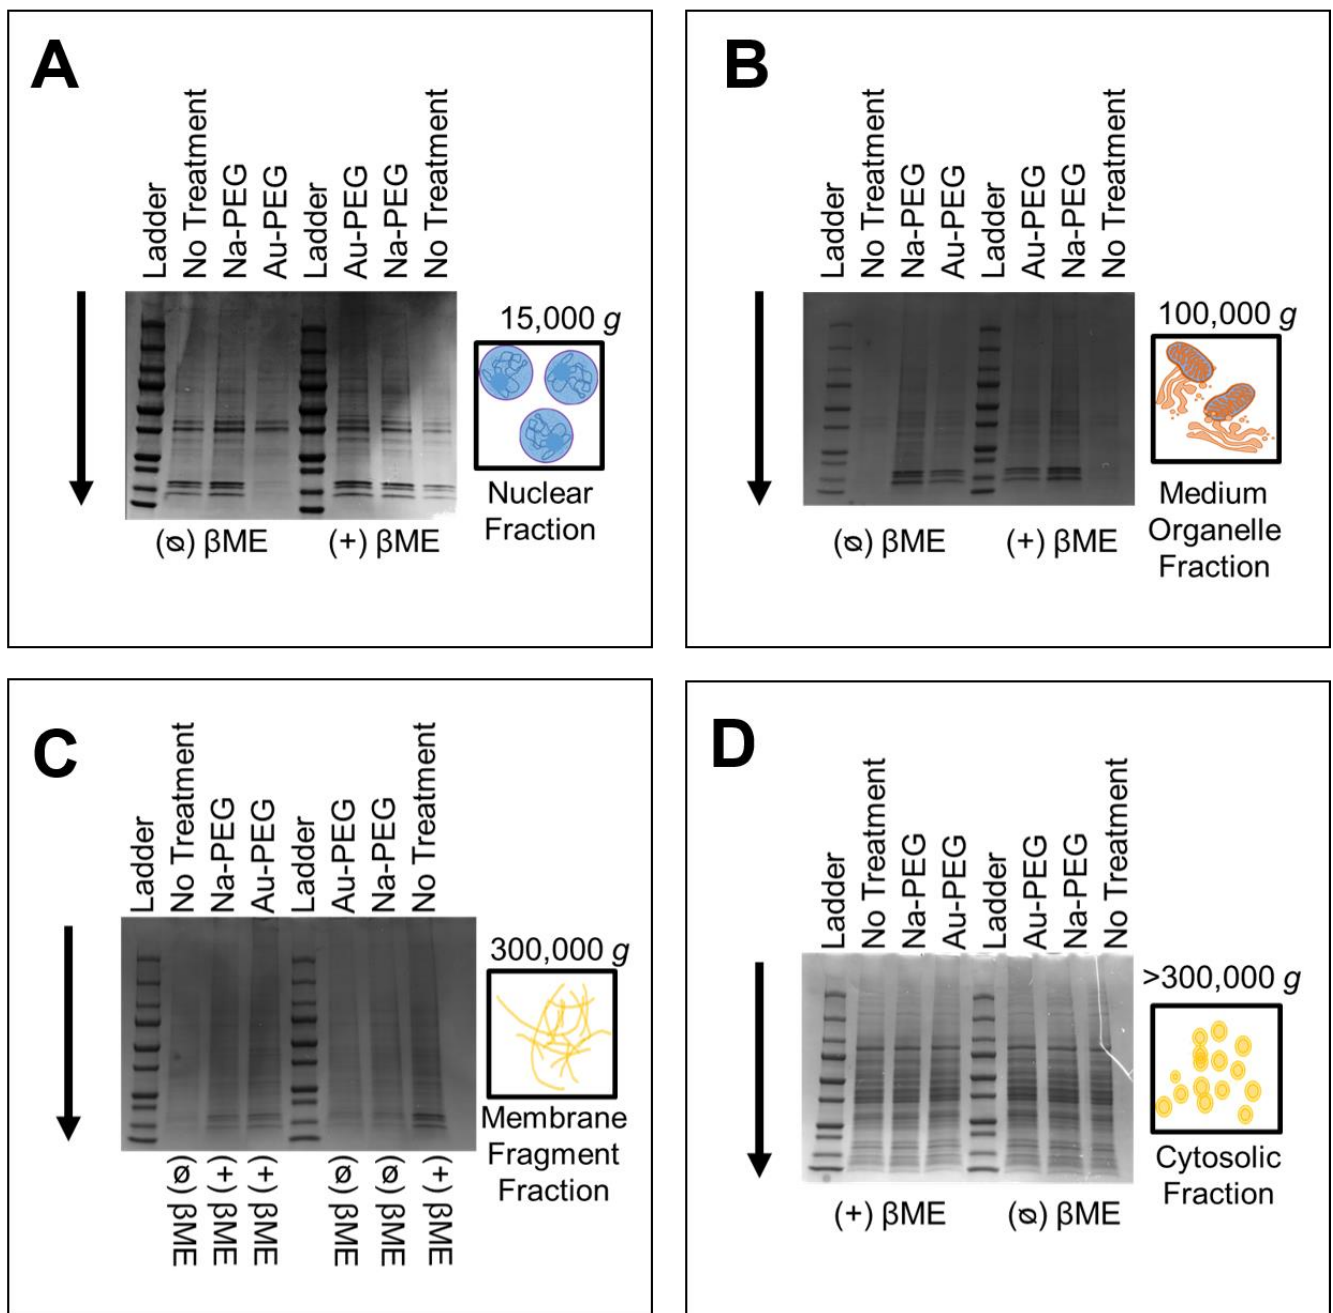

**Supplementary Figure 3.** Confirmation of intracellular reduction by SDS-PAGE: SDS-PAGE stained with Coomassie Blue of cellular fractions including (A) nuclear, 15,000 g; (B) medium organelle, 100,000 g; (C) membrane fragments, 300,000 g; and (D) cytosolic, >300,000 g regions of MCF-7 cells untreated, treated with Na-PEG, or Au-PEG with either standard SDS-PAGE conditions [(+) βME], or without β-mercaptoethanol [(∅) βME]. Arrows indicate direction of protein migration due to electrophoresis.

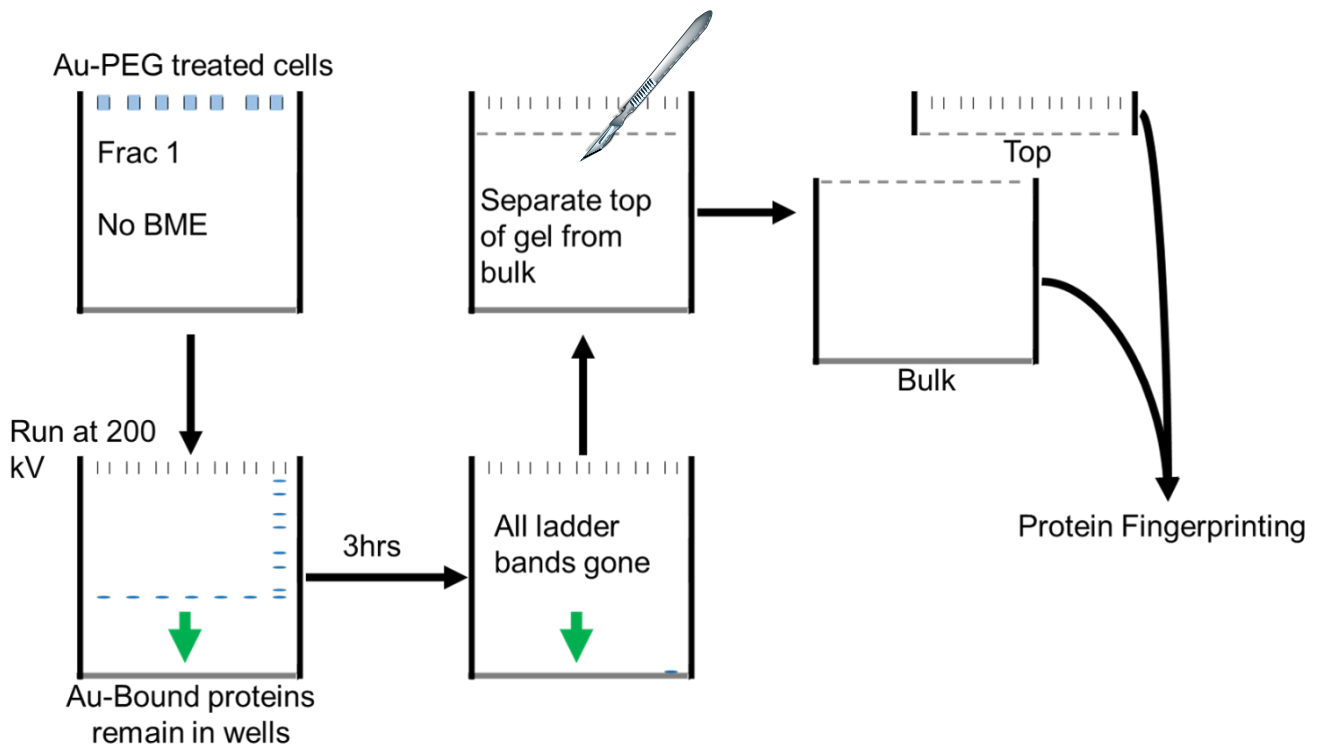

**Supplementary Figure 4.** Schematic for separation of Au bound proteins from the non-bounded ones: The process describing the separation of Au-bound proteins from non-bound ones through gel electrophoresis, followed by separation of portions of the gel for LC-MS analysis.

| Protein Name                             | Subcellular Location      |                 |              |                       |          |                    |         |
|------------------------------------------|---------------------------|-----------------|--------------|-----------------------|----------|--------------------|---------|
|                                          | extracellular or secreted | plasma membrane | cytoskeleton | endoplasmic reticulum | lysosome | cytosol/ cytoplasm | nucleus |
| Zymogen granule protein 16 homolog B     | ■                         |                 |              |                       |          |                    |         |
| Secretoglobin family 1D member 2         | ■                         |                 |              |                       |          |                    |         |
| Immunoglobulin lambda-like polypeptide 5 | ■                         |                 |              |                       |          |                    |         |
| Alpha-amylase 2B                         | ■                         |                 |              |                       |          |                    |         |
| Immunoglobulin heavy constant alpha 1    | ■                         | ■               |              |                       |          |                    |         |
| 1,4-alpha-glucan-branching enzyme        | ■                         |                 |              |                       |          | ■                  |         |
| Cadherin-23                              |                           | ■               |              |                       |          |                    |         |
| SRC kinase signaling inhibitor 1         |                           | ■               | ■            |                       |          |                    |         |
| Integrin beta-1-binding protein 1        |                           | ■               | ■            |                       |          |                    | ■       |
| Peroxioredoxin-4                         |                           |                 |              | ■                     |          | ■                  |         |
| JNK1/MAPK8-associated membrane protein   |                           |                 |              | ■                     |          |                    |         |
| Ganglioside GM2 activator                |                           |                 |              |                       | ■        |                    |         |
| Calmodulin-1                             |                           |                 | ■            |                       |          |                    |         |
| Titin                                    |                           |                 |              |                       |          |                    | ■       |
| Protein FRG1                             |                           |                 |              |                       |          |                    | ■       |
| Probable ATP-dependent RNA helicase      |                           |                 |              |                       |          |                    | ■       |

**Supplementary Table 1.** Proteins identified from the LC-MS analysis and the subcellular regions in which they are located, as annotated on UniProt.org through COMPARTMENTS.<sup>1</sup>

| Protein Name                             | GO Term         |                    |                   |                        |                     |                        |                 |             |                                   |                                |                    |                |               |                                          |                               |                 |                                 |                    |                          |                                |  |
|------------------------------------------|-----------------|--------------------|-------------------|------------------------|---------------------|------------------------|-----------------|-------------|-----------------------------------|--------------------------------|--------------------|----------------|---------------|------------------------------------------|-------------------------------|-----------------|---------------------------------|--------------------|--------------------------|--------------------------------|--|
|                                          | protein binding | hydrolase activity | metal ion binding | protein kinase binding | calcium ion binding | actin filament binding | antigen binding | ATP binding | B cell receptor signaling pathway | carbohydrate metabolic process | catalytic activity | cation binding | cell adhesion | complement activation, classical pathway | defense response to bacterium | immune response | immunoglobulin receptor binding | muscle contraction | neutrophil degranulation | nucleoside diphosphate binding |  |
| Zymogen granule protein 16 homolog B     |                 |                    |                   |                        |                     |                        |                 |             |                                   |                                |                    |                |               |                                          |                               |                 |                                 |                    |                          |                                |  |
| Secretoglobin family 1D member 2         |                 |                    |                   |                        |                     |                        |                 |             |                                   |                                |                    |                |               |                                          |                               |                 |                                 |                    |                          |                                |  |
| Immunoglobulin lambda-like polypeptide 5 |                 |                    |                   |                        |                     |                        |                 |             |                                   |                                |                    |                |               |                                          |                               |                 |                                 |                    |                          |                                |  |
| Alpha-amylase 2B                         |                 |                    |                   |                        |                     |                        |                 |             |                                   |                                |                    |                |               |                                          |                               |                 |                                 |                    |                          |                                |  |
| Immunoglobulin heavy constant alpha 1    |                 |                    |                   |                        |                     |                        |                 |             |                                   |                                |                    |                |               |                                          |                               |                 |                                 |                    |                          |                                |  |
| 1,4-alpha-glucan-branching enzyme        |                 |                    |                   |                        |                     |                        |                 |             |                                   |                                |                    |                |               |                                          |                               |                 |                                 |                    |                          |                                |  |
| Cadherin-23                              |                 |                    |                   |                        |                     |                        |                 |             |                                   |                                |                    |                |               |                                          |                               |                 |                                 |                    |                          |                                |  |
| SRC kinase signaling inhibitor 1         |                 |                    |                   |                        |                     |                        |                 |             |                                   |                                |                    |                |               |                                          |                               |                 |                                 |                    |                          |                                |  |
| Integrin beta-1-binding protein 1        |                 |                    |                   |                        |                     |                        |                 |             |                                   |                                |                    |                |               |                                          |                               |                 |                                 |                    |                          |                                |  |
| Peroxisome biogenesis factor 4           |                 |                    |                   |                        |                     |                        |                 |             |                                   |                                |                    |                |               |                                          |                               |                 |                                 |                    |                          |                                |  |
| JNK1/MAPK8-associated membrane protein   |                 |                    |                   |                        |                     |                        |                 |             |                                   |                                |                    |                |               |                                          |                               |                 |                                 |                    |                          |                                |  |
| Ganglioside GM2 activator                |                 |                    |                   |                        |                     |                        |                 |             |                                   |                                |                    |                |               |                                          |                               |                 |                                 |                    |                          |                                |  |
| Calmodulin-1                             |                 |                    |                   |                        |                     |                        |                 |             |                                   |                                |                    |                |               |                                          |                               |                 |                                 |                    |                          |                                |  |
| Tin                                      |                 |                    |                   |                        |                     |                        |                 |             |                                   |                                |                    |                |               |                                          |                               |                 |                                 |                    |                          |                                |  |
| Protein FRG1                             |                 |                    |                   |                        |                     |                        |                 |             |                                   |                                |                    |                |               |                                          |                               |                 |                                 |                    |                          |                                |  |
| Probable ATP-dependent RNA helicase      |                 |                    |                   |                        |                     |                        |                 |             |                                   |                                |                    |                |               |                                          |                               |                 |                                 |                    |                          |                                |  |

| Protein Name                             | GO Term                  |                    |                          |                           |                        |                                 |                                 |                              |                                       |                                 |                                                |                         |                    |                     |             |                      |                                     |                  |                                   |                    |  |
|------------------------------------------|--------------------------|--------------------|--------------------------|---------------------------|------------------------|---------------------------------|---------------------------------|------------------------------|---------------------------------------|---------------------------------|------------------------------------------------|-------------------------|--------------------|---------------------|-------------|----------------------|-------------------------------------|------------------|-----------------------------------|--------------------|--|
|                                          | neutrophil degranulation | nucleotide binding | phagocytosis, engulfment | phagocytosis, recognition | platelet degranulation | protein domain specific binding | regulation of B cell activation | regulation of cell migration | regulation of protein kinase activity | regulation of protein secretion | regulation of protein tyrosine kinase activity | response to calcium ion | retina homeostasis | ribosome biogenesis | RNA binding | transferase activity | *binds androgens and other steroids | *binds estradiol | 1,4-alpha-glucan branching enzyme | hydrolase activity |  |
| Zymogen granule protein 16 homolog B     |                          |                    |                          |                           |                        |                                 |                                 |                              |                                       |                                 |                                                |                         |                    |                     |             |                      |                                     |                  |                                   |                    |  |
| Secretoglobin family 1D member 2         |                          |                    |                          |                           |                        |                                 |                                 |                              |                                       |                                 |                                                |                         |                    |                     |             |                      |                                     |                  |                                   |                    |  |
| Immunoglobulin lambda-like polypeptide 5 |                          |                    |                          |                           |                        |                                 |                                 |                              |                                       |                                 |                                                |                         |                    |                     |             |                      |                                     |                  |                                   |                    |  |
| Alpha-amylase 2B                         |                          |                    |                          |                           |                        |                                 |                                 |                              |                                       |                                 |                                                |                         |                    |                     |             |                      |                                     |                  |                                   |                    |  |
| Immunoglobulin heavy constant alpha 1    |                          |                    |                          |                           |                        |                                 |                                 |                              |                                       |                                 |                                                |                         |                    |                     |             |                      |                                     |                  |                                   |                    |  |
| 1,4-alpha-glucan-branching enzyme        |                          |                    |                          |                           |                        |                                 |                                 |                              |                                       |                                 |                                                |                         |                    |                     |             |                      |                                     |                  |                                   |                    |  |
| Cadherin-23                              |                          |                    |                          |                           |                        |                                 |                                 |                              |                                       |                                 |                                                |                         |                    |                     |             |                      |                                     |                  |                                   |                    |  |
| SRC kinase signaling inhibitor 1         |                          |                    |                          |                           |                        |                                 |                                 |                              |                                       |                                 |                                                |                         |                    |                     |             |                      |                                     |                  |                                   |                    |  |
| Integrin beta-1-binding protein 1        |                          |                    |                          |                           |                        |                                 |                                 |                              |                                       |                                 |                                                |                         |                    |                     |             |                      |                                     |                  |                                   |                    |  |
| Peroxisome biogenesis factor 4           |                          |                    |                          |                           |                        |                                 |                                 |                              |                                       |                                 |                                                |                         |                    |                     |             |                      |                                     |                  |                                   |                    |  |
| JNK1/MAPK8-associated membrane protein   |                          |                    |                          |                           |                        |                                 |                                 |                              |                                       |                                 |                                                |                         |                    |                     |             |                      |                                     |                  |                                   |                    |  |
| Ganglioside GM2 activator                |                          |                    |                          |                           |                        |                                 |                                 |                              |                                       |                                 |                                                |                         |                    |                     |             |                      |                                     |                  |                                   |                    |  |
| Calmodulin-1                             |                          |                    |                          |                           |                        |                                 |                                 |                              |                                       |                                 |                                                |                         |                    |                     |             |                      |                                     |                  |                                   |                    |  |
| Tin                                      |                          |                    |                          |                           |                        |                                 |                                 |                              |                                       |                                 |                                                |                         |                    |                     |             |                      |                                     |                  |                                   |                    |  |
| Protein FRG1                             |                          |                    |                          |                           |                        |                                 |                                 |                              |                                       |                                 |                                                |                         |                    |                     |             |                      |                                     |                  |                                   |                    |  |
| Probable ATP-dependent RNA helicase      |                          |                    |                          |                           |                        |                                 |                                 |                              |                                       |                                 |                                                |                         |                    |                     |             |                      |                                     |                  |                                   |                    |  |

| Protein Name                             | GO Term                     |               |                 |                                          |                                         |                                      |                           |                        |              |                      |                                         |                                      |                               |                                    |                       |                                      |                                   |                            |                    |                       |  |
|------------------------------------------|-----------------------------|---------------|-----------------|------------------------------------------|-----------------------------------------|--------------------------------------|---------------------------|------------------------|--------------|----------------------|-----------------------------------------|--------------------------------------|-------------------------------|------------------------------------|-----------------------|--------------------------------------|-----------------------------------|----------------------------|--------------------|-----------------------|--|
|                                          | 4-hydroxyproline metabolism | actin binding | actinin binding | activation of adenylate cyclase activity | activation of protein kinase B activity | adenylate cyclase activator activity | adenylate cyclase binding | alpha-amylase activity | angiogenesis | antioxidant activity | beta-N-acetylgalactosaminidase activity | beta-N-acetylhexosaminidase activity | biomineral tissue development | calcium channel inhibitor activity | calcium ion transport | calcium-dependent cell-cell adhesion | calcium-dependent protein binding | calcium-mediated signaling | calmodulin binding | cartilage development |  |
| Zymogen granule protein 16 homolog B     |                             |               |                 |                                          |                                         |                                      |                           |                        |              |                      |                                         |                                      |                               |                                    |                       |                                      |                                   |                            |                    |                       |  |
| Secretoglobin family 1D member 2         |                             |               |                 |                                          |                                         |                                      |                           |                        |              |                      |                                         |                                      |                               |                                    |                       |                                      |                                   |                            |                    |                       |  |
| Immunoglobulin lambda-like polypeptide 5 |                             |               |                 |                                          |                                         |                                      |                           |                        |              |                      |                                         |                                      |                               |                                    |                       |                                      |                                   |                            |                    |                       |  |
| Alpha-amylase 2B                         |                             |               |                 |                                          |                                         |                                      |                           |                        |              |                      |                                         |                                      |                               |                                    |                       |                                      |                                   |                            |                    |                       |  |
| Immunoglobulin heavy constant alpha 1    |                             |               |                 |                                          |                                         |                                      |                           |                        |              |                      |                                         |                                      |                               |                                    |                       |                                      |                                   |                            |                    |                       |  |
| 1,4-alpha-glucan-branching enzyme        |                             |               |                 |                                          |                                         |                                      |                           |                        |              |                      |                                         |                                      |                               |                                    |                       |                                      |                                   |                            |                    |                       |  |
| Cadherin-23                              |                             |               |                 |                                          |                                         |                                      |                           |                        |              |                      |                                         |                                      |                               |                                    |                       |                                      |                                   |                            |                    |                       |  |
| SRC kinase signaling inhibitor 1         |                             |               |                 |                                          |                                         |                                      |                           |                        |              |                      |                                         |                                      |                               |                                    |                       |                                      |                                   |                            |                    |                       |  |
| Integrin beta-1-binding protein 1        |                             |               |                 |                                          |                                         |                                      |                           |                        |              |                      |                                         |                                      |                               |                                    |                       |                                      |                                   |                            |                    |                       |  |
| Peroxisome biogenesis factor 4           |                             |               |                 |                                          |                                         |                                      |                           |                        |              |                      |                                         |                                      |                               |                                    |                       |                                      |                                   |                            |                    |                       |  |
| JNK1/MAPK8-associated membrane protein   |                             |               |                 |                                          |                                         |                                      |                           |                        |              |                      |                                         |                                      |                               |                                    |                       |                                      |                                   |                            |                    |                       |  |
| Ganglioside GM2 activator                |                             |               |                 |                                          |                                         |                                      |                           |                        |              |                      |                                         |                                      |                               |                                    |                       |                                      |                                   |                            |                    |                       |  |
| Calmodulin-1                             |                             |               |                 |                                          |                                         |                                      |                           |                        |              |                      |                                         |                                      |                               |                                    |                       |                                      |                                   |                            |                    |                       |  |
| Tin                                      |                             |               |                 |                                          |                                         |                                      |                           |                        |              |                      |                                         |                                      |                               |                                    |                       |                                      |                                   |                            |                    |                       |  |
| Protein FRG1                             |                             |               |                 |                                          |                                         |                                      |                           |                        |              |                      |                                         |                                      |                               |                                    |                       |                                      |                                   |                            |                    |                       |  |
| Probable ATP-dependent RNA helicase      |                             |               |                 |                                          |                                         |                                      |                           |                        |              |                      |                                         |                                      |                               |                                    |                       |                                      |                                   |                            |                    |                       |  |

| Protein Name                             | GO Term              |                            |                                  |                            |                                     |                            |                      |                        |                                 |                                               |                                                         |                            |                          |                             |                                    |                           |                |                  |                                       |                                       |  |
|------------------------------------------|----------------------|----------------------------|----------------------------------|----------------------------|-------------------------------------|----------------------------|----------------------|------------------------|---------------------------------|-----------------------------------------------|---------------------------------------------------------|----------------------------|--------------------------|-----------------------------|------------------------------------|---------------------------|----------------|------------------|---------------------------------------|---------------------------------------|--|
|                                          | carbohydrate binding | cardiac muscle contraction | cardiac muscle fiber development | cardiac muscle hypertrophy | cardiac muscle tissue morphogenesis | cardiac myofibril assembly | cell differentiation | cell redox homeostasis | cellular oxidant detoxification | cellular response to fibroblast growth factor | cellular response to vascular endothelial growth factor | cofactor metabolic process | detection of calcium ion | detection of muscle stretch | disordered domain specific binding | enzyme activator activity | enzyme binding | equilibrioceptor | establishment of protein localization | establishment of protein localization |  |
| Zymogen granule protein 16 homolog B     |                      |                            |                                  |                            |                                     |                            |                      |                        |                                 |                                               |                                                         |                            |                          |                             |                                    |                           |                |                  |                                       |                                       |  |
| Secretoglobin family 1D member 2         |                      |                            |                                  |                            |                                     |                            |                      |                        |                                 |                                               |                                                         |                            |                          |                             |                                    |                           |                |                  |                                       |                                       |  |
| Immunoglobulin lambda-like polypeptide 5 |                      |                            |                                  |                            |                                     |                            |                      |                        |                                 |                                               |                                                         |                            |                          |                             |                                    |                           |                |                  |                                       |                                       |  |
| Alpha-amylase 2B                         |                      |                            |                                  |                            |                                     |                            |                      |                        |                                 |                                               |                                                         |                            |                          |                             |                                    |                           |                |                  |                                       |                                       |  |
| Immunoglobulin heavy constant alpha 1    |                      |                            |                                  |                            |                                     |                            |                      |                        |                                 |                                               |                                                         |                            |                          |                             |                                    |                           |                |                  |                                       |                                       |  |
| 1,4-alpha-glucan-branching enzyme        |                      |                            |                                  |                            |                                     |                            |                      |                        |                                 |                                               |                                                         |                            |                          |                             |                                    |                           |                |                  |                                       |                                       |  |
| Cadherin-23                              |                      |                            |                                  |                            |                                     |                            |                      |                        |                                 |                                               |                                                         |                            |                          |                             |                                    |                           |                |                  |                                       |                                       |  |
| SRC kinase signaling inhibitor 1         |                      |                            |                                  |                            |                                     |                            |                      |                        |                                 |                                               |                                                         |                            |                          |                             |                                    |                           |                |                  |                                       |                                       |  |
| Integrin beta-1-binding protein 1        |                      |                            |                                  |                            |                                     |                            |                      |                        |                                 |                                               |                                                         |                            |                          |                             |                                    |                           |                |                  |                                       |                                       |  |
| Peroxisome biogenesis factor 4           |                      |                            |                                  |                            |                                     |                            |                      |                        |                                 |                                               |                                                         |                            |                          |                             |                                    |                           |                |                  |                                       |                                       |  |
| JNK1/MAPK8-associated membrane protein   |                      |                            |                                  |                            |                                     |                            |                      |                        |                                 |                                               |                                                         |                            |                          |                             |                                    |                           |                |                  |                                       |                                       |  |
| Ganglioside GM2 activator                |                      |                            |                                  |                            |                                     |                            |                      |                        |                                 |                                               |                                                         |                            |                          |                             |                                    |                           |                |                  |                                       |                                       |  |
| Calmodulin-1                             |                      |                            |                                  |                            |                                     |                            |                      |                        |                                 |                                               |                                                         |                            |                          |                             |                                    |                           |                |                  |                                       |                                       |  |
| Tin                                      |                      |                            |                                  |                            |                                     |                            |                      |                        |                                 |                                               |                                                         |                            |                          |                             |                                    |                           |                |                  |                                       |                                       |  |
| Protein FRG1                             |                      |                            |                                  |                            |                                     |                            |                      |                        |                                 |                                               |                                                         |                            |                          |                             |                                    |                           |                |                  |                                       |                                       |  |
| Probable ATP-dependent RNA helicase      |                      |                            |                                  |                            |                                     |                            |                      |                        |                                 |                                               |                                                         |                            |                          |                             |                                    |                           |                |                  |                                       |                                       |  |

**Supplementary Table 2.** Proteins identified from the LC-MS analysis and the molecular processes in which they are involved, as annotated on UniProt.org through phylogenetic-based propagation of functional gene ontology (GO) annotations.<sup>2</sup>

| Protein Name                             | GO Term                               |              |                                   |                                       |                |                                      |                               |                               |                                     |                                                |                       |                               |                            |                                     |                   |                                     |                                     |                           |                         |          |  |
|------------------------------------------|---------------------------------------|--------------|-----------------------------------|---------------------------------------|----------------|--------------------------------------|-------------------------------|-------------------------------|-------------------------------------|------------------------------------------------|-----------------------|-------------------------------|----------------------------|-------------------------------------|-------------------|-------------------------------------|-------------------------------------|---------------------------|-------------------------|----------|--|
|                                          | establishment of protein localization | cytotoxicity | extracellular matrix organization | Fc-epsilon receptor signaling pathway | focal adhesion | G protein-coupled receptor signaling | ganglioside catabolic process | ganglioside metabolic process | GDP-dissociation inhibitor activity | generation of precursor metabolites and energy | glomerular filtration | glycogen biosynthetic process | glycogen metabolic process | glycosphingolipid metabolic process | helicase activity | homophilic cell adhesion via plasma | hydrogen peroxide catabolic process | identical protein binding | H-1appB phosphorylation | in st pr |  |
| Zymogen granule protein 16 homolog B     |                                       |              |                                   |                                       |                |                                      |                               |                               |                                     |                                                |                       |                               |                            |                                     |                   |                                     |                                     |                           |                         |          |  |
| Secretoglobin family 1D member 2         |                                       |              |                                   |                                       |                |                                      |                               |                               |                                     |                                                |                       |                               |                            |                                     |                   |                                     |                                     |                           |                         |          |  |
| Immunoglobulin lambda-like polypeptide 5 |                                       |              |                                   |                                       |                |                                      |                               |                               |                                     |                                                |                       |                               |                            |                                     |                   |                                     |                                     |                           |                         |          |  |
| Alpha-amylase 2B                         |                                       |              |                                   |                                       |                |                                      |                               |                               |                                     |                                                |                       |                               |                            |                                     |                   |                                     |                                     |                           |                         |          |  |
| Immunoglobulin heavy constant alpha 1    |                                       |              |                                   |                                       |                |                                      |                               |                               |                                     |                                                |                       |                               |                            |                                     |                   |                                     |                                     |                           |                         |          |  |
| 1,4-alpha-glucan-branching enzyme        |                                       |              |                                   |                                       |                |                                      |                               |                               |                                     |                                                |                       |                               |                            |                                     |                   |                                     |                                     |                           |                         |          |  |
| Cadherin-23                              |                                       |              |                                   |                                       |                |                                      |                               |                               |                                     |                                                |                       |                               |                            |                                     |                   |                                     |                                     |                           |                         |          |  |
| SPC kinase signaling inhibitor 1         |                                       |              |                                   |                                       |                |                                      |                               |                               |                                     |                                                |                       |                               |                            |                                     |                   |                                     |                                     |                           |                         |          |  |
| Integrin beta-1-binding protein 1        |                                       |              |                                   |                                       |                |                                      |                               |                               |                                     |                                                |                       |                               |                            |                                     |                   |                                     |                                     |                           |                         |          |  |
| Peroxisome-4                             |                                       |              |                                   |                                       |                |                                      |                               |                               |                                     |                                                |                       |                               |                            |                                     |                   |                                     |                                     |                           |                         |          |  |
| JNK1/MAPK8-associated membrane protein   |                                       |              |                                   |                                       |                |                                      |                               |                               |                                     |                                                |                       |                               |                            |                                     |                   |                                     |                                     |                           |                         |          |  |
| Ganglioside GM2 activator                |                                       |              |                                   |                                       |                |                                      |                               |                               |                                     |                                                |                       |                               |                            |                                     |                   |                                     |                                     |                           |                         |          |  |
| Calmodulin-1                             |                                       |              |                                   |                                       |                |                                      |                               |                               |                                     |                                                |                       |                               |                            |                                     |                   |                                     |                                     |                           |                         |          |  |
| Ten                                      |                                       |              |                                   |                                       |                |                                      |                               |                               |                                     |                                                |                       |                               |                            |                                     |                   |                                     |                                     |                           |                         |          |  |
| Protein FRG1                             |                                       |              |                                   |                                       |                |                                      |                               |                               |                                     |                                                |                       |                               |                            |                                     |                   |                                     |                                     |                           |                         |          |  |
| Probable ATP-dependent RNA helicase      |                                       |              |                                   |                                       |                |                                      |                               |                               |                                     |                                                |                       |                               |                            |                                     |                   |                                     |                                     |                           |                         |          |  |

| Protein Name                             | GO Term               |                                      |                                      |                                       |                     |                  |                                     |                                   |                     |                 |                    |                     |                         |               |                            |                     |                        |              |                   |           |  |
|------------------------------------------|-----------------------|--------------------------------------|--------------------------------------|---------------------------------------|---------------------|------------------|-------------------------------------|-----------------------------------|---------------------|-----------------|--------------------|---------------------|-------------------------|---------------|----------------------------|---------------------|------------------------|--------------|-------------------|-----------|--|
|                                          | immune system process | inner ear receptor cell stereocilium | inositol phosphate metabolic process | inositol-1,4,5-trisphosphate 3-kinase | integrin activation | integrin binding | integrin-mediated signaling pathway | intracellular signal transduction | ion channel binding | kinase activity | learning or memory | leukocyte migration | lipid metabolic process | lipid storage | lipid transporter activity | locomotory behavior | male gonad development | MAPK cascade | metabolic process | n chv cor |  |
| Zymogen granule protein 16 homolog B     |                       |                                      |                                      |                                       |                     |                  |                                     |                                   |                     |                 |                    |                     |                         |               |                            |                     |                        |              |                   |           |  |
| Secretoglobin family 1D member 2         |                       |                                      |                                      |                                       |                     |                  |                                     |                                   |                     |                 |                    |                     |                         |               |                            |                     |                        |              |                   |           |  |
| Immunoglobulin lambda-like polypeptide 5 |                       |                                      |                                      |                                       |                     |                  |                                     |                                   |                     |                 |                    |                     |                         |               |                            |                     |                        |              |                   |           |  |
| Alpha-amylase 2B                         |                       |                                      |                                      |                                       |                     |                  |                                     |                                   |                     |                 |                    |                     |                         |               |                            |                     |                        |              |                   |           |  |
| Immunoglobulin heavy constant alpha 1    |                       |                                      |                                      |                                       |                     |                  |                                     |                                   |                     |                 |                    |                     |                         |               |                            |                     |                        |              |                   |           |  |
| 1,4-alpha-glucan-branching enzyme        |                       |                                      |                                      |                                       |                     |                  |                                     |                                   |                     |                 |                    |                     |                         |               |                            |                     |                        |              |                   |           |  |
| Cadherin-23                              |                       |                                      |                                      |                                       |                     |                  |                                     |                                   |                     |                 |                    |                     |                         |               |                            |                     |                        |              |                   |           |  |
| SPC kinase signaling inhibitor 1         |                       |                                      |                                      |                                       |                     |                  |                                     |                                   |                     |                 |                    |                     |                         |               |                            |                     |                        |              |                   |           |  |
| Integrin beta-1-binding protein 1        |                       |                                      |                                      |                                       |                     |                  |                                     |                                   |                     |                 |                    |                     |                         |               |                            |                     |                        |              |                   |           |  |
| Peroxisome-4                             |                       |                                      |                                      |                                       |                     |                  |                                     |                                   |                     |                 |                    |                     |                         |               |                            |                     |                        |              |                   |           |  |
| JNK1/MAPK8-associated membrane protein   |                       |                                      |                                      |                                       |                     |                  |                                     |                                   |                     |                 |                    |                     |                         |               |                            |                     |                        |              |                   |           |  |
| Ganglioside GM2 activator                |                       |                                      |                                      |                                       |                     |                  |                                     |                                   |                     |                 |                    |                     |                         |               |                            |                     |                        |              |                   |           |  |
| Calmodulin-1                             |                       |                                      |                                      |                                       |                     |                  |                                     |                                   |                     |                 |                    |                     |                         |               |                            |                     |                        |              |                   |           |  |
| Ten                                      |                       |                                      |                                      |                                       |                     |                  |                                     |                                   |                     |                 |                    |                     |                         |               |                            |                     |                        |              |                   |           |  |
| Protein FRG1                             |                       |                                      |                                      |                                       |                     |                  |                                     |                                   |                     |                 |                    |                     |                         |               |                            |                     |                        |              |                   |           |  |
| Probable ATP-dependent RNA helicase      |                       |                                      |                                      |                                       |                     |                  |                                     |                                   |                     |                 |                    |                     |                         |               |                            |                     |                        |              |                   |           |  |

| Protein Name                             | GO Term                         |                    |                 |                                |                              |                         |                          |                    |                        |                                           |                               |                                          |                         |                                          |                      |                                   |                             |                         |                                   |       |  |
|------------------------------------------|---------------------------------|--------------------|-----------------|--------------------------------|------------------------------|-------------------------|--------------------------|--------------------|------------------------|-------------------------------------------|-------------------------------|------------------------------------------|-------------------------|------------------------------------------|----------------------|-----------------------------------|-----------------------------|-------------------------|-----------------------------------|-------|--|
|                                          | mitotic chromosome condensation | molecular function | mRNA processing | mRNA splicing, via spliceosome | muscle alpha-actinin binding | muscle filament sliding | muscle organ development | myoblast migration | nervous system process | neuromuscular process controlling balance | nitric-oxide synthase binding | nitric-oxide synthase regulator activity | Notch signaling pathway | N-terminal myristoylation domain binding | nucleic acid binding | oligosaccharide catabolic process | oxidation-reduction process | oxidoreductase activity | peptidyl-tyrosine phosphorylation | per a |  |
| Zymogen granule protein 16 homolog B     |                                 |                    |                 |                                |                              |                         |                          |                    |                        |                                           |                               |                                          |                         |                                          |                      |                                   |                             |                         |                                   |       |  |
| Secretoglobin family 1D member 2         |                                 |                    |                 |                                |                              |                         |                          |                    |                        |                                           |                               |                                          |                         |                                          |                      |                                   |                             |                         |                                   |       |  |
| Immunoglobulin lambda-like polypeptide 5 |                                 |                    |                 |                                |                              |                         |                          |                    |                        |                                           |                               |                                          |                         |                                          |                      |                                   |                             |                         |                                   |       |  |
| Alpha-amylase 2B                         |                                 |                    |                 |                                |                              |                         |                          |                    |                        |                                           |                               |                                          |                         |                                          |                      |                                   |                             |                         |                                   |       |  |
| Immunoglobulin heavy constant alpha 1    |                                 |                    |                 |                                |                              |                         |                          |                    |                        |                                           |                               |                                          |                         |                                          |                      |                                   |                             |                         |                                   |       |  |
| 1,4-alpha-glucan-branching enzyme        |                                 |                    |                 |                                |                              |                         |                          |                    |                        |                                           |                               |                                          |                         |                                          |                      |                                   |                             |                         |                                   |       |  |
| Cadherin-23                              |                                 |                    |                 |                                |                              |                         |                          |                    |                        |                                           |                               |                                          |                         |                                          |                      |                                   |                             |                         |                                   |       |  |
| SPC kinase signaling inhibitor 1         |                                 |                    |                 |                                |                              |                         |                          |                    |                        |                                           |                               |                                          |                         |                                          |                      |                                   |                             |                         |                                   |       |  |
| Integrin beta-1-binding protein 1        |                                 |                    |                 |                                |                              |                         |                          |                    |                        |                                           |                               |                                          |                         |                                          |                      |                                   |                             |                         |                                   |       |  |
| Peroxisome-4                             |                                 |                    |                 |                                |                              |                         |                          |                    |                        |                                           |                               |                                          |                         |                                          |                      |                                   |                             |                         |                                   |       |  |
| JNK1/MAPK8-associated membrane protein   |                                 |                    |                 |                                |                              |                         |                          |                    |                        |                                           |                               |                                          |                         |                                          |                      |                                   |                             |                         |                                   |       |  |
| Ganglioside GM2 activator                |                                 |                    |                 |                                |                              |                         |                          |                    |                        |                                           |                               |                                          |                         |                                          |                      |                                   |                             |                         |                                   |       |  |
| Calmodulin-1                             |                                 |                    |                 |                                |                              |                         |                          |                    |                        |                                           |                               |                                          |                         |                                          |                      |                                   |                             |                         |                                   |       |  |
| Ten                                      |                                 |                    |                 |                                |                              |                         |                          |                    |                        |                                           |                               |                                          |                         |                                          |                      |                                   |                             |                         |                                   |       |  |
| Protein FRG1                             |                                 |                    |                 |                                |                              |                         |                          |                    |                        |                                           |                               |                                          |                         |                                          |                      |                                   |                             |                         |                                   |       |  |
| Probable ATP-dependent RNA helicase      |                                 |                    |                 |                                |                              |                         |                          |                    |                        |                                           |                               |                                          |                         |                                          |                      |                                   |                             |                         |                                   |       |  |

| Protein Name                             | GO Term             |                            |                                       |                                  |                 |                                |                  |                                   |                            |                                       |                            |                                        |                         |                          |                                           |                   |                              |                                  |                             |                 |  |
|------------------------------------------|---------------------|----------------------------|---------------------------------------|----------------------------------|-----------------|--------------------------------|------------------|-----------------------------------|----------------------------|---------------------------------------|----------------------------|----------------------------------------|-------------------------|--------------------------|-------------------------------------------|-------------------|------------------------------|----------------------------------|-----------------------------|-----------------|--|
|                                          | peroxidase activity | peroxidoreductase activity | phosphatidylinositol 3-kinase binding | phospholipase activator activity | phosphorylation | photoreceptor cell maintenance | protease binding | protein homodimerization activity | protein kinase A signaling | protein maturation by protein folding | protein N-terminus binding | protein phosphatase activator activity | protein phosphorylation | protein self-association | protein serine/threonine kinase activator | protein transport | protein transporter activity | protein tyrosine kinase activity | protein-chromophore linkage | Ras nucleotidyl |  |
| Zymogen granule protein 16 homolog B     |                     |                            |                                       |                                  |                 |                                |                  |                                   |                            |                                       |                            |                                        |                         |                          |                                           |                   |                              |                                  |                             |                 |  |
| Secretoglobin family 1D member 2         |                     |                            |                                       |                                  |                 |                                |                  |                                   |                            |                                       |                            |                                        |                         |                          |                                           |                   |                              |                                  |                             |                 |  |
| Immunoglobulin lambda-like polypeptide 5 |                     |                            |                                       |                                  |                 |                                |                  |                                   |                            |                                       |                            |                                        |                         |                          |                                           |                   |                              |                                  |                             |                 |  |
| Alpha-amylase 2B                         |                     |                            |                                       |                                  |                 |                                |                  |                                   |                            |                                       |                            |                                        |                         |                          |                                           |                   |                              |                                  |                             |                 |  |
| Immunoglobulin heavy constant alpha 1    |                     |                            |                                       |                                  |                 |                                |                  |                                   |                            |                                       |                            |                                        |                         |                          |                                           |                   |                              |                                  |                             |                 |  |
| 1,4-alpha-glucan-branching enzyme        |                     |                            |                                       |                                  |                 |                                |                  |                                   |                            |                                       |                            |                                        |                         |                          |                                           |                   |                              |                                  |                             |                 |  |
| Cadherin-23                              |                     |                            |                                       |                                  |                 |                                |                  |                                   |                            |                                       |                            |                                        |                         |                          |                                           |                   |                              |                                  |                             |                 |  |
| SPC kinase signaling inhibitor 1         |                     |                            |                                       |                                  |                 |                                |                  |                                   |                            |                                       |                            |                                        |                         |                          |                                           |                   |                              |                                  |                             |                 |  |
| Integrin beta-1-binding protein 1        |                     |                            |                                       |                                  |                 |                                |                  |                                   |                            |                                       |                            |                                        |                         |                          |                                           |                   |                              |                                  |                             |                 |  |
| Peroxisome-4                             |                     |                            |                                       |                                  |                 |                                |                  |                                   |                            |                                       |                            |                                        |                         |                          |                                           |                   |                              |                                  |                             |                 |  |
| JNK1/MAPK8-associated membrane protein   |                     |                            |                                       |                                  |                 |                                |                  |                                   |                            |                                       |                            |                                        |                         |                          |                                           |                   |                              |                                  |                             |                 |  |
| Ganglioside GM2 activator                |                     |                            |                                       |                                  |                 |                                |                  |                                   |                            |                                       |                            |                                        |                         |                          |                                           |                   |                              |                                  |                             |                 |  |
| Calmodulin-1                             |                     |                            |                                       |                                  |                 |                                |                  |                                   |                            |                                       |                            |                                        |                         |                          |                                           |                   |                              |                                  |                             |                 |  |
| Ten                                      |                     |                            |                                       |                                  |                 |                                |                  |                                   |                            |                                       |                            |                                        |                         |                          |                                           |                   |                              |                                  |                             |                 |  |
| Protein FRG1                             |                     |                            |                                       |                                  |                 |                                |                  |                                   |                            |                                       |                            |                                        |                         |                          |                                           |                   |                              |                                  |                             |                 |  |
| Probable ATP-dependent RNA helicase      |                     |                            |                                       |                                  |                 |                                |                  |                                   |                            |                                       |                            |                                        |                         |                          |                                           |                   |                              |                                  |                             |                 |  |

**Supplementary Table 2 contd.** Proteins identified from the LC-MS analysis and the molecular processes in which they are involved, as annotated on UniProt.org through phylogenetic-based propagation of functional gene ontology (GO) annotations.<sup>2</sup>



| Protein Name                             | GO Term                               |                                   |                     |                               |                                      |                                 |                                          |                                          |                                  |                                         |                                         |                                     |                             |                                          |                                  |                                           |                           |                                                 |                                         |     |
|------------------------------------------|---------------------------------------|-----------------------------------|---------------------|-------------------------------|--------------------------------------|---------------------------------|------------------------------------------|------------------------------------------|----------------------------------|-----------------------------------------|-----------------------------------------|-------------------------------------|-----------------------------|------------------------------------------|----------------------------------|-------------------------------------------|---------------------------|-------------------------------------------------|-----------------------------------------|-----|
|                                          | Ras guanyl-nucleotide exchange factor | reactive oxygen species metabolic | receptor clustering | receptor-mediated endocytosis | regulation by host of symbiont cAMP- | regulation of blood vessel size | regulation of cardiac muscle contraction | regulation of cardiac muscle contraction | regulation of catalytic activity | regulation of cell adhesion involved in | regulation of cell adhesion mediated by | regulation of cell communication by | regulation of cell division | regulation of cell migration involved in | regulation of cell proliferation | regulation of cyclic-nucleotide phosphode | regulation of cytokinesis | regulation of cytosolic calcium ion concentrati | regulation of dendritic spine morphogen | reg |
| Zymogen granule protein 16 homolog B     |                                       |                                   |                     |                               |                                      |                                 |                                          |                                          |                                  |                                         |                                         |                                     |                             |                                          |                                  |                                           |                           |                                                 |                                         |     |
| Secretoglobin family 1D member 2         |                                       |                                   |                     |                               |                                      |                                 |                                          |                                          |                                  |                                         |                                         |                                     |                             |                                          |                                  |                                           |                           |                                                 |                                         |     |
| Immunoglobulin lambda-like polypeptide 5 |                                       |                                   |                     |                               |                                      |                                 |                                          |                                          |                                  |                                         |                                         |                                     |                             |                                          |                                  |                                           |                           |                                                 |                                         |     |
| Alpha-amylase 2B                         |                                       |                                   |                     |                               |                                      |                                 |                                          |                                          |                                  |                                         |                                         |                                     |                             |                                          |                                  |                                           |                           |                                                 |                                         |     |
| Immunoglobulin heavy constant alpha 1    |                                       |                                   |                     |                               |                                      |                                 |                                          |                                          |                                  |                                         |                                         |                                     |                             |                                          |                                  |                                           |                           |                                                 |                                         |     |
| 1,4-alpha-glucan-branching enzyme        |                                       |                                   |                     |                               |                                      |                                 |                                          |                                          |                                  |                                         |                                         |                                     |                             |                                          |                                  |                                           |                           |                                                 |                                         |     |
| Cadherin-23                              |                                       |                                   |                     |                               |                                      |                                 |                                          |                                          |                                  |                                         |                                         |                                     |                             |                                          |                                  |                                           |                           |                                                 |                                         |     |
| SRC kinase signaling inhibitor 1         |                                       |                                   |                     |                               |                                      |                                 |                                          |                                          |                                  |                                         |                                         |                                     |                             |                                          |                                  |                                           |                           |                                                 |                                         |     |
| Integin beta-1-binding protein 1         |                                       |                                   |                     |                               |                                      |                                 |                                          |                                          |                                  |                                         |                                         |                                     |                             |                                          |                                  |                                           |                           |                                                 |                                         |     |
| Peroxidase-4                             |                                       |                                   |                     |                               |                                      |                                 |                                          |                                          |                                  |                                         |                                         |                                     |                             |                                          |                                  |                                           |                           |                                                 |                                         |     |
| JNK1/MAPK8-associated membrane protein   |                                       |                                   |                     |                               |                                      |                                 |                                          |                                          |                                  |                                         |                                         |                                     |                             |                                          |                                  |                                           |                           |                                                 |                                         |     |
| Ganglioside GM2 activator                |                                       |                                   |                     |                               |                                      |                                 |                                          |                                          |                                  |                                         |                                         |                                     |                             |                                          |                                  |                                           |                           |                                                 |                                         |     |
| Calmodulin-1                             |                                       |                                   |                     |                               |                                      |                                 |                                          |                                          |                                  |                                         |                                         |                                     |                             |                                          |                                  |                                           |                           |                                                 |                                         |     |
| Titin                                    |                                       |                                   |                     |                               |                                      |                                 |                                          |                                          |                                  |                                         |                                         |                                     |                             |                                          |                                  |                                           |                           |                                                 |                                         |     |
| Protein FRG1                             |                                       |                                   |                     |                               |                                      |                                 |                                          |                                          |                                  |                                         |                                         |                                     |                             |                                          |                                  |                                           |                           |                                                 |                                         |     |
| Probable ATP-dependent RNA helicase      |                                       |                                   |                     |                               |                                      |                                 |                                          |                                          |                                  |                                         |                                         |                                     |                             |                                          |                                  |                                           |                           |                                                 |                                         |     |

| Protein Name                             | GO Term                                     |                                       |                                              |                                 |                                  |                                   |                                     |                                            |                                            |                                           |                                    |                         |                            |                              |                      |                              |              |                 |                        |      |
|------------------------------------------|---------------------------------------------|---------------------------------------|----------------------------------------------|---------------------------------|----------------------------------|-----------------------------------|-------------------------------------|--------------------------------------------|--------------------------------------------|-------------------------------------------|------------------------------------|-------------------------|----------------------------|------------------------------|----------------------|------------------------------|--------------|-----------------|------------------------|------|
|                                          | regulation of protein targeting to membrane | regulation of protein tyrosine kinase | regulation of release of sequestered calcium | regulation of respiratory burst | regulation of rhodopsin mediated | regulation of ryanodine-sensitive | regulation of stress fiber assembly | regulation of substrate adhesion-dependent | regulation of synaptic vesicle endocytosis | regulation of synaptic vesicle exocytosis | regulation of transcription by RNA | response to amphetamine | response to corticosterone | response to oxidative stress | response to stimulus | response to unfolded protein | RNA splicing | rRNA processing | sarcomere organization | sarc |
| Zymogen granule protein 16 homolog B     |                                             |                                       |                                              |                                 |                                  |                                   |                                     |                                            |                                            |                                           |                                    |                         |                            |                              |                      |                              |              |                 |                        |      |
| Secretoglobin family 1D member 2         |                                             |                                       |                                              |                                 |                                  |                                   |                                     |                                            |                                            |                                           |                                    |                         |                            |                              |                      |                              |              |                 |                        |      |
| Immunoglobulin lambda-like polypeptide 5 |                                             |                                       |                                              |                                 |                                  |                                   |                                     |                                            |                                            |                                           |                                    |                         |                            |                              |                      |                              |              |                 |                        |      |
| Alpha-amylase 2B                         |                                             |                                       |                                              |                                 |                                  |                                   |                                     |                                            |                                            |                                           |                                    |                         |                            |                              |                      |                              |              |                 |                        |      |
| Immunoglobulin heavy constant alpha 1    |                                             |                                       |                                              |                                 |                                  |                                   |                                     |                                            |                                            |                                           |                                    |                         |                            |                              |                      |                              |              |                 |                        |      |
| 1,4-alpha-glucan-branching enzyme        |                                             |                                       |                                              |                                 |                                  |                                   |                                     |                                            |                                            |                                           |                                    |                         |                            |                              |                      |                              |              |                 |                        |      |
| Cadherin-23                              |                                             |                                       |                                              |                                 |                                  |                                   |                                     |                                            |                                            |                                           |                                    |                         |                            |                              |                      |                              |              |                 |                        |      |
| SRC kinase signaling inhibitor 1         |                                             |                                       |                                              |                                 |                                  |                                   |                                     |                                            |                                            |                                           |                                    |                         |                            |                              |                      |                              |              |                 |                        |      |
| Integin beta-1-binding protein 1         |                                             |                                       |                                              |                                 |                                  |                                   |                                     |                                            |                                            |                                           |                                    |                         |                            |                              |                      |                              |              |                 |                        |      |
| Peroxidase-4                             |                                             |                                       |                                              |                                 |                                  |                                   |                                     |                                            |                                            |                                           |                                    |                         |                            |                              |                      |                              |              |                 |                        |      |
| JNK1/MAPK8-associated membrane protein   |                                             |                                       |                                              |                                 |                                  |                                   |                                     |                                            |                                            |                                           |                                    |                         |                            |                              |                      |                              |              |                 |                        |      |
| Ganglioside GM2 activator                |                                             |                                       |                                              |                                 |                                  |                                   |                                     |                                            |                                            |                                           |                                    |                         |                            |                              |                      |                              |              |                 |                        |      |
| Calmodulin-1                             |                                             |                                       |                                              |                                 |                                  |                                   |                                     |                                            |                                            |                                           |                                    |                         |                            |                              |                      |                              |              |                 |                        |      |
| Titin                                    |                                             |                                       |                                              |                                 |                                  |                                   |                                     |                                            |                                            |                                           |                                    |                         |                            |                              |                      |                              |              |                 |                        |      |
| Protein FRG1                             |                                             |                                       |                                              |                                 |                                  |                                   |                                     |                                            |                                            |                                           |                                    |                         |                            |                              |                      |                              |              |                 |                        |      |
| Probable ATP-dependent RNA helicase      |                                             |                                       |                                              |                                 |                                  |                                   |                                     |                                            |                                            |                                           |                                    |                         |                            |                              |                      |                              |              |                 |                        |      |

| Protein Name                             | GO Term                     |                                        |                 |                                         |                                |                                       |                                  |                                         |                              |                                   |                    |                                 |               |                |                                        |                                  |                                  |                   |                                |  |
|------------------------------------------|-----------------------------|----------------------------------------|-----------------|-----------------------------------------|--------------------------------|---------------------------------------|----------------------------------|-----------------------------------------|------------------------------|-----------------------------------|--------------------|---------------------------------|---------------|----------------|----------------------------------------|----------------------------------|----------------------------------|-------------------|--------------------------------|--|
|                                          | sensory perception of sound | skeletal muscle thin filament assembly | spermatogenesis | sphingolipid activator protein activity | sphingolipid metabolic process | striated muscle myosin thick filament | structural constituent of muscle | structural molecule activity conferring | substantia nigra development | substrate adhesion-dependent cell | telithonin binding | thioredoxin peroxidase activity | titin binding | tube formation | type 3 metabotropic glutamate receptor | ubiquitin protein ligase binding | ubiquitin-dependent ERAD pathway | visual perception | Wnt signaling pathway, calcium |  |
| Zymogen granule protein 16 homolog B     |                             |                                        |                 |                                         |                                |                                       |                                  |                                         |                              |                                   |                    |                                 |               |                |                                        |                                  |                                  |                   |                                |  |
| Secretoglobin family 1D member 2         |                             |                                        |                 |                                         |                                |                                       |                                  |                                         |                              |                                   |                    |                                 |               |                |                                        |                                  |                                  |                   |                                |  |
| Immunoglobulin lambda-like polypeptide 5 |                             |                                        |                 |                                         |                                |                                       |                                  |                                         |                              |                                   |                    |                                 |               |                |                                        |                                  |                                  |                   |                                |  |
| Alpha-amylase 2B                         |                             |                                        |                 |                                         |                                |                                       |                                  |                                         |                              |                                   |                    |                                 |               |                |                                        |                                  |                                  |                   |                                |  |
| Immunoglobulin heavy constant alpha 1    |                             |                                        |                 |                                         |                                |                                       |                                  |                                         |                              |                                   |                    |                                 |               |                |                                        |                                  |                                  |                   |                                |  |
| 1,4-alpha-glucan-branching enzyme        |                             |                                        |                 |                                         |                                |                                       |                                  |                                         |                              |                                   |                    |                                 |               |                |                                        |                                  |                                  |                   |                                |  |
| Cadherin-23                              |                             |                                        |                 |                                         |                                |                                       |                                  |                                         |                              |                                   |                    |                                 |               |                |                                        |                                  |                                  |                   |                                |  |
| SRC kinase signaling inhibitor 1         |                             |                                        |                 |                                         |                                |                                       |                                  |                                         |                              |                                   |                    |                                 |               |                |                                        |                                  |                                  |                   |                                |  |
| Integin beta-1-binding protein 1         |                             |                                        |                 |                                         |                                |                                       |                                  |                                         |                              |                                   |                    |                                 |               |                |                                        |                                  |                                  |                   |                                |  |
| Peroxidase-4                             |                             |                                        |                 |                                         |                                |                                       |                                  |                                         |                              |                                   |                    |                                 |               |                |                                        |                                  |                                  |                   |                                |  |
| JNK1/MAPK8-associated membrane protein   |                             |                                        |                 |                                         |                                |                                       |                                  |                                         |                              |                                   |                    |                                 |               |                |                                        |                                  |                                  |                   |                                |  |
| Ganglioside GM2 activator                |                             |                                        |                 |                                         |                                |                                       |                                  |                                         |                              |                                   |                    |                                 |               |                |                                        |                                  |                                  |                   |                                |  |
| Calmodulin-1                             |                             |                                        |                 |                                         |                                |                                       |                                  |                                         |                              |                                   |                    |                                 |               |                |                                        |                                  |                                  |                   |                                |  |
| Titin                                    |                             |                                        |                 |                                         |                                |                                       |                                  |                                         |                              |                                   |                    |                                 |               |                |                                        |                                  |                                  |                   |                                |  |
| Protein FRG1                             |                             |                                        |                 |                                         |                                |                                       |                                  |                                         |                              |                                   |                    |                                 |               |                |                                        |                                  |                                  |                   |                                |  |
| Probable ATP-dependent RNA helicase      |                             |                                        |                 |                                         |                                |                                       |                                  |                                         |                              |                                   |                    |                                 |               |                |                                        |                                  |                                  |                   |                                |  |

**Supplementary Table 2 contd.** Proteins identified from the LC-MS analysis and the molecular processes in which they are involved, as annotated on UniProt.org through phylogenetic-based propagation of functional gene ontology (GO) annotations.<sup>2</sup>

| Protein Name                             | GO Term          |                                      |                             |                                        |                 |                                         |                                |                                       |                                  |                                         |                              |                                   |                    |                                 |               |                |                                        |                                  |                                  |                   |  |
|------------------------------------------|------------------|--------------------------------------|-----------------------------|----------------------------------------|-----------------|-----------------------------------------|--------------------------------|---------------------------------------|----------------------------------|-----------------------------------------|------------------------------|-----------------------------------|--------------------|---------------------------------|---------------|----------------|----------------------------------------|----------------------------------|----------------------------------|-------------------|--|
|                                          | sarcomeregenesis | sensory perception of light stimulus | sensory perception of sound | skeletal muscle thin filament assembly | spermatogenesis | sphingolipid activator protein activity | sphingolipid metabolic process | striated muscle myosin thick filament | structural constituent of muscle | structural molecule activity conferring | substantia nigra development | substrate adhesion-dependent cell | telethonin binding | thioredoxin peroxidase activity | titin binding | tube formation | type 3 metabotropic glutamate receptor | ubiquitin protein ligase binding | ubiquitin-dependent ERAD pathway | visual perception |  |
| Zymogen granule protein 16 homolog B     |                  |                                      |                             |                                        |                 |                                         |                                |                                       |                                  |                                         |                              |                                   |                    |                                 |               |                |                                        |                                  |                                  |                   |  |
| Secretoglobin family 1D member 2         |                  |                                      |                             |                                        |                 |                                         |                                |                                       |                                  |                                         |                              |                                   |                    |                                 |               |                |                                        |                                  |                                  |                   |  |
| Immunoglobulin lambda-like polypeptide 5 |                  |                                      |                             |                                        |                 |                                         |                                |                                       |                                  |                                         |                              |                                   |                    |                                 |               |                |                                        |                                  |                                  |                   |  |
| Alpha-amylase 2B                         |                  |                                      |                             |                                        |                 |                                         |                                |                                       |                                  |                                         |                              |                                   |                    |                                 |               |                |                                        |                                  |                                  |                   |  |
| Immunoglobulin heavy constant alpha 1    |                  |                                      |                             |                                        |                 |                                         |                                |                                       |                                  |                                         |                              |                                   |                    |                                 |               |                |                                        |                                  |                                  |                   |  |
| 1,4-alpha-glucan-branching enzyme        |                  |                                      |                             |                                        |                 |                                         |                                |                                       |                                  |                                         |                              |                                   |                    |                                 |               |                |                                        |                                  |                                  |                   |  |
| Cadherin-23                              |                  |                                      |                             |                                        |                 |                                         |                                |                                       |                                  |                                         |                              |                                   |                    |                                 |               |                |                                        |                                  |                                  |                   |  |
| SRC kinase signaling inhibitor 1         |                  |                                      |                             |                                        |                 |                                         |                                |                                       |                                  |                                         |                              |                                   |                    |                                 |               |                |                                        |                                  |                                  |                   |  |
| Integrin beta-1-binding protein 1        |                  |                                      |                             |                                        |                 |                                         |                                |                                       |                                  |                                         |                              |                                   |                    |                                 |               |                |                                        |                                  |                                  |                   |  |
| Peroxisome-4                             |                  |                                      |                             |                                        |                 |                                         |                                |                                       |                                  |                                         |                              |                                   |                    |                                 |               |                |                                        |                                  |                                  |                   |  |
| JNK1/MAPK8-associated membrane protein   |                  |                                      |                             |                                        |                 |                                         |                                |                                       |                                  |                                         |                              |                                   |                    |                                 |               |                |                                        |                                  |                                  |                   |  |
| Ganglioside GM2 activator                |                  |                                      |                             |                                        |                 |                                         |                                |                                       |                                  |                                         |                              |                                   |                    |                                 |               |                |                                        |                                  |                                  |                   |  |
| Calmodulin-1                             |                  |                                      |                             |                                        |                 |                                         |                                |                                       |                                  |                                         |                              |                                   |                    |                                 |               |                |                                        |                                  |                                  |                   |  |
| Titin                                    |                  |                                      |                             |                                        |                 |                                         |                                |                                       |                                  |                                         |                              |                                   |                    |                                 |               |                |                                        |                                  |                                  |                   |  |
| Protein FRG1                             |                  |                                      |                             |                                        |                 |                                         |                                |                                       |                                  |                                         |                              |                                   |                    |                                 |               |                |                                        |                                  |                                  |                   |  |
| Probable ATP-dependent RNA helicase      |                  |                                      |                             |                                        |                 |                                         |                                |                                       |                                  |                                         |                              |                                   |                    |                                 |               |                |                                        |                                  |                                  |                   |  |

| Protein Name                             | GO Term                                |                 |                                         |                                |                                       |                                  |                                         |                              |                                   |                    |                                 |               |                |                                        |                                  |                                  |                   |                                |  |
|------------------------------------------|----------------------------------------|-----------------|-----------------------------------------|--------------------------------|---------------------------------------|----------------------------------|-----------------------------------------|------------------------------|-----------------------------------|--------------------|---------------------------------|---------------|----------------|----------------------------------------|----------------------------------|----------------------------------|-------------------|--------------------------------|--|
|                                          | skeletal muscle thin filament assembly | spermatogenesis | sphingolipid activator protein activity | sphingolipid metabolic process | striated muscle myosin thick filament | structural constituent of muscle | structural molecule activity conferring | substantia nigra development | substrate adhesion-dependent cell | telethonin binding | thioredoxin peroxidase activity | titin binding | tube formation | type 3 metabotropic glutamate receptor | ubiquitin protein ligase binding | ubiquitin-dependent ERAD pathway | visual perception | Wnt signaling pathway, calcium |  |
| Zymogen granule protein 16 homolog B     |                                        |                 |                                         |                                |                                       |                                  |                                         |                              |                                   |                    |                                 |               |                |                                        |                                  |                                  |                   |                                |  |
| Secretoglobin family 1D member 2         |                                        |                 |                                         |                                |                                       |                                  |                                         |                              |                                   |                    |                                 |               |                |                                        |                                  |                                  |                   |                                |  |
| Immunoglobulin lambda-like polypeptide 5 |                                        |                 |                                         |                                |                                       |                                  |                                         |                              |                                   |                    |                                 |               |                |                                        |                                  |                                  |                   |                                |  |
| Alpha-amylase 2B                         |                                        |                 |                                         |                                |                                       |                                  |                                         |                              |                                   |                    |                                 |               |                |                                        |                                  |                                  |                   |                                |  |
| Immunoglobulin heavy constant alpha 1    |                                        |                 |                                         |                                |                                       |                                  |                                         |                              |                                   |                    |                                 |               |                |                                        |                                  |                                  |                   |                                |  |
| 1,4-alpha-glucan-branching enzyme        |                                        |                 |                                         |                                |                                       |                                  |                                         |                              |                                   |                    |                                 |               |                |                                        |                                  |                                  |                   |                                |  |
| Cadherin-23                              |                                        |                 |                                         |                                |                                       |                                  |                                         |                              |                                   |                    |                                 |               |                |                                        |                                  |                                  |                   |                                |  |
| SRC kinase signaling inhibitor 1         |                                        |                 |                                         |                                |                                       |                                  |                                         |                              |                                   |                    |                                 |               |                |                                        |                                  |                                  |                   |                                |  |
| Integrin beta-1-binding protein 1        |                                        |                 |                                         |                                |                                       |                                  |                                         |                              |                                   |                    |                                 |               |                |                                        |                                  |                                  |                   |                                |  |
| Peroxisome-4                             |                                        |                 |                                         |                                |                                       |                                  |                                         |                              |                                   |                    |                                 |               |                |                                        |                                  |                                  |                   |                                |  |
| JNK1/MAPK8-associated membrane protein   |                                        |                 |                                         |                                |                                       |                                  |                                         |                              |                                   |                    |                                 |               |                |                                        |                                  |                                  |                   |                                |  |
| Ganglioside GM2 activator                |                                        |                 |                                         |                                |                                       |                                  |                                         |                              |                                   |                    |                                 |               |                |                                        |                                  |                                  |                   |                                |  |
| Calmodulin-1                             |                                        |                 |                                         |                                |                                       |                                  |                                         |                              |                                   |                    |                                 |               |                |                                        |                                  |                                  |                   |                                |  |
| Titin                                    |                                        |                 |                                         |                                |                                       |                                  |                                         |                              |                                   |                    |                                 |               |                |                                        |                                  |                                  |                   |                                |  |
| Protein FRG1                             |                                        |                 |                                         |                                |                                       |                                  |                                         |                              |                                   |                    |                                 |               |                |                                        |                                  |                                  |                   |                                |  |
| Probable ATP-dependent RNA helicase      |                                        |                 |                                         |                                |                                       |                                  |                                         |                              |                                   |                    |                                 |               |                |                                        |                                  |                                  |                   |                                |  |

**Supplementary Table 2 contd.** Proteins identified from the LC-MS analysis and the molecular processes in which they are involved, as annotated on UniProt.org through phylogenetic-based propagation of functional gene ontology (GO) annotations.<sup>2</sup>

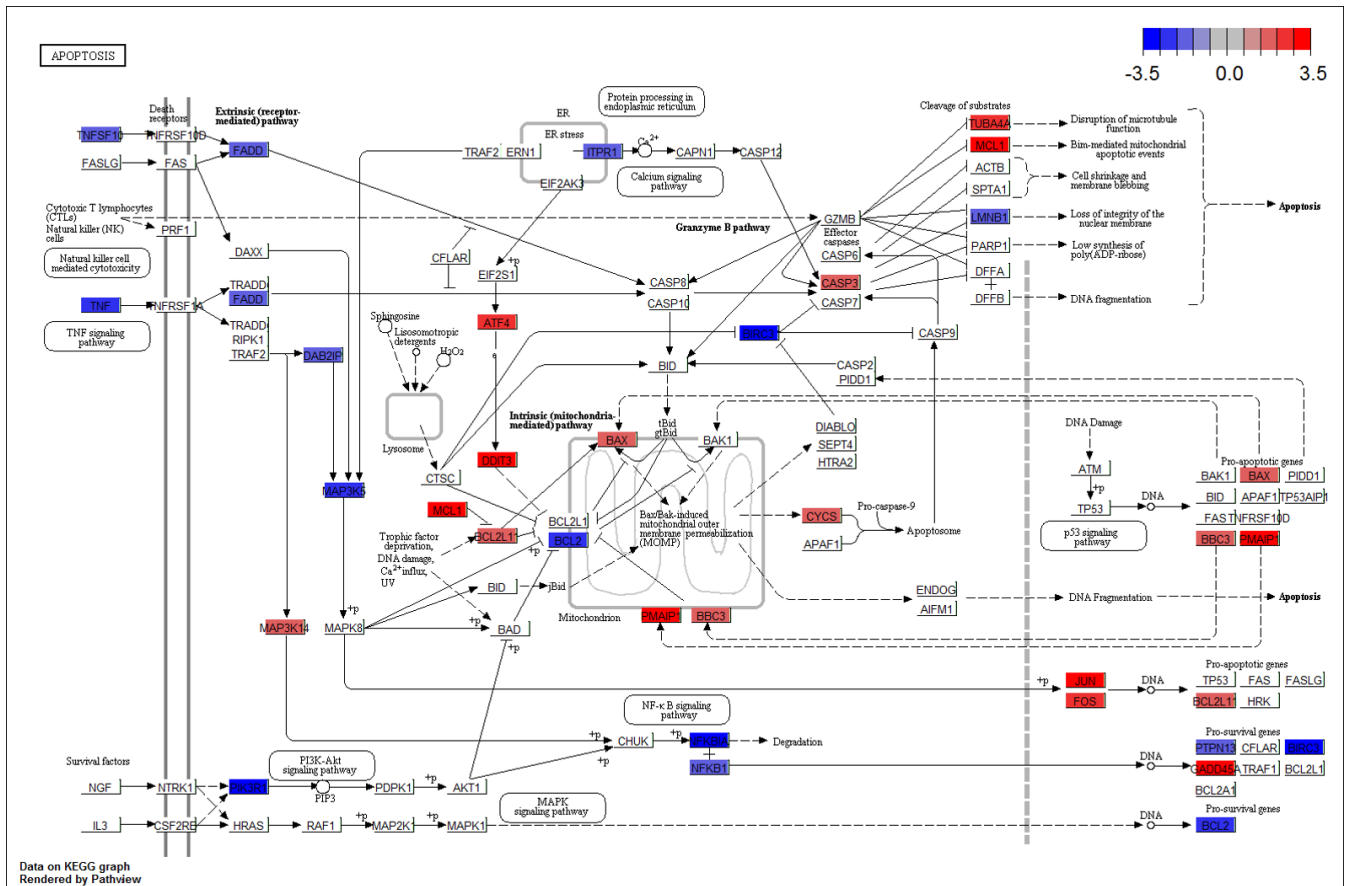

**Supplementary Figure 5.** Microarray based analysis for apoptosis related KEGG pathways for ionic gold treatment: Log-Fold-Change of gene regulation represented through apoptosis related KEGG pathways quantified through microarray analysis comparing Au-PEG treatments against untreated MCF-7 cells.

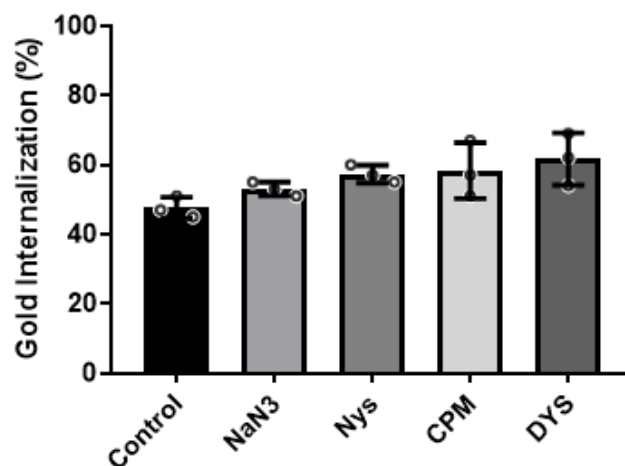

**Supplementary Figure 6.** Investigation of gold internalization pathway: Percentage of gold internalization in MCF-7 cells via application of ionic Au-PEG clusters at 0.24 mM Au<sup>3+</sup>(control), or ionic Au-PEG clusters in presence of several endocytic inhibitors is shown. Different endocytic inhibitors employed in this study were sodium azide (NaN<sub>3</sub>), 2-deoxyglucose, nystatin (Nys), chlorpromazine (CPM), and dynasore. Error bars are standard deviations of the mean (n=3 biologically independent samples).

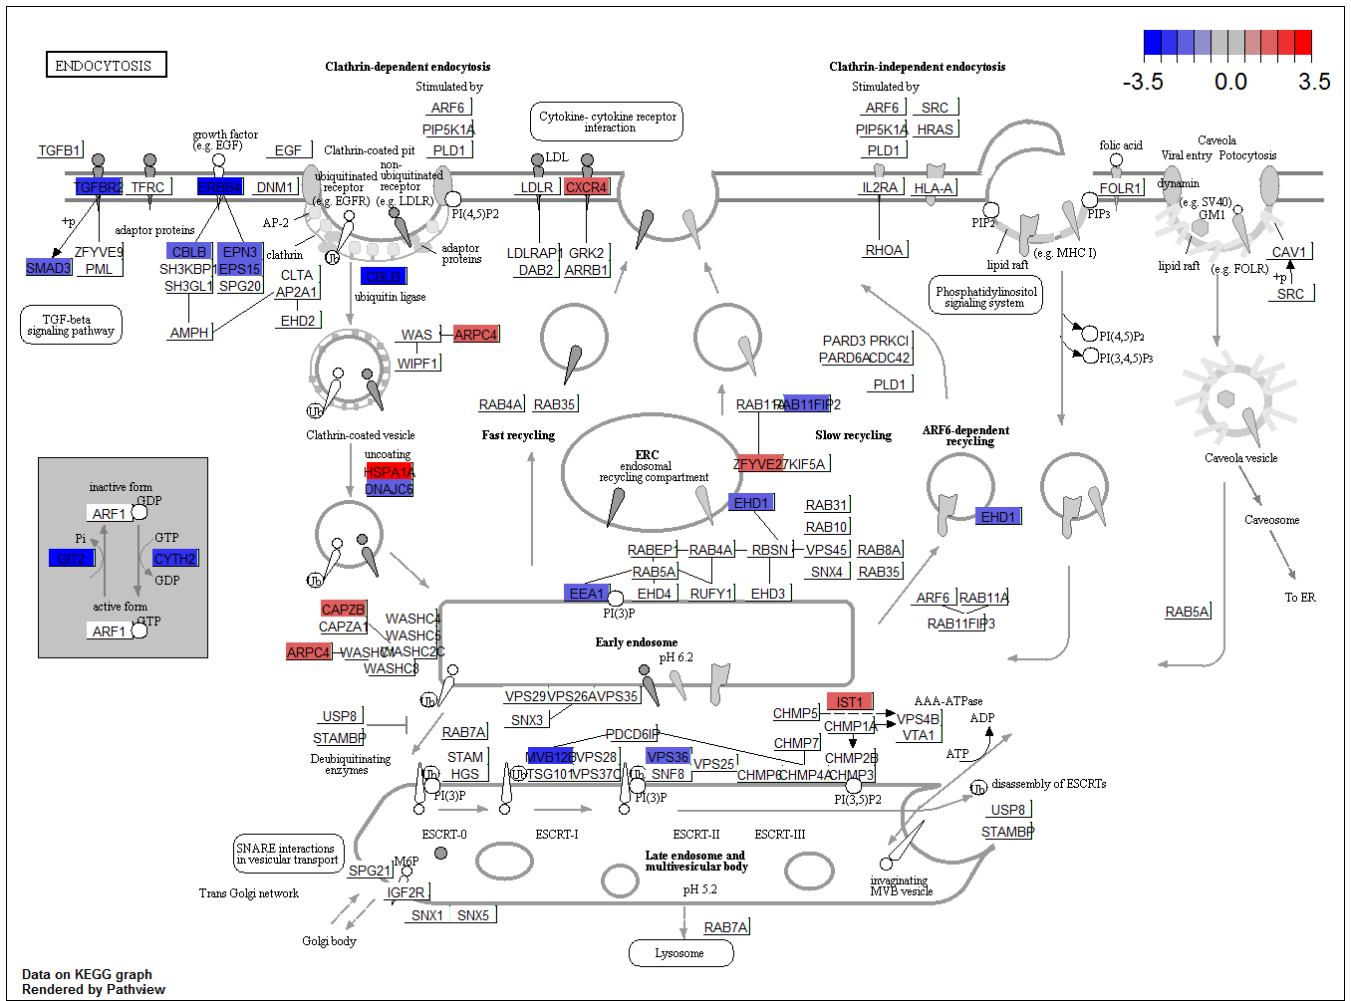

**Supplementary Figure 7.** Microarray based analysis for endocytosis related KEGG pathways for ionic gold treatment: Log-Fold-Change of gene regulation represented through endocytosis related KEGG pathways quantified through microarray analysis comparing Au-PEG treatments against untreated MCF-7 cells.

**A**

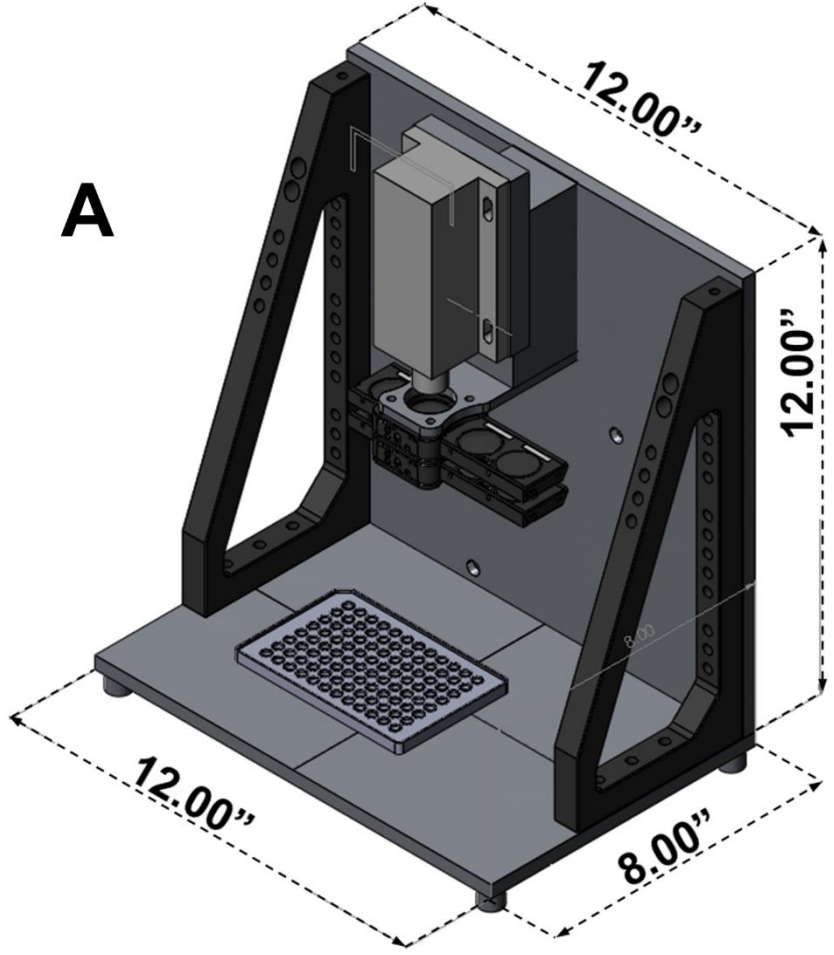

**Top**

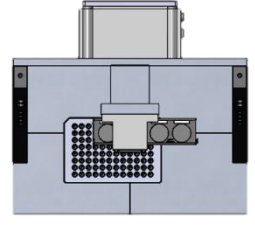

**Side**

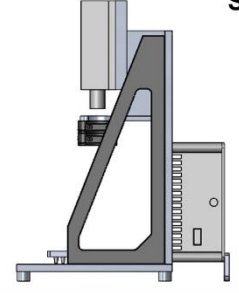

**Front**

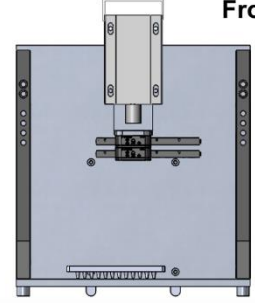

**B**

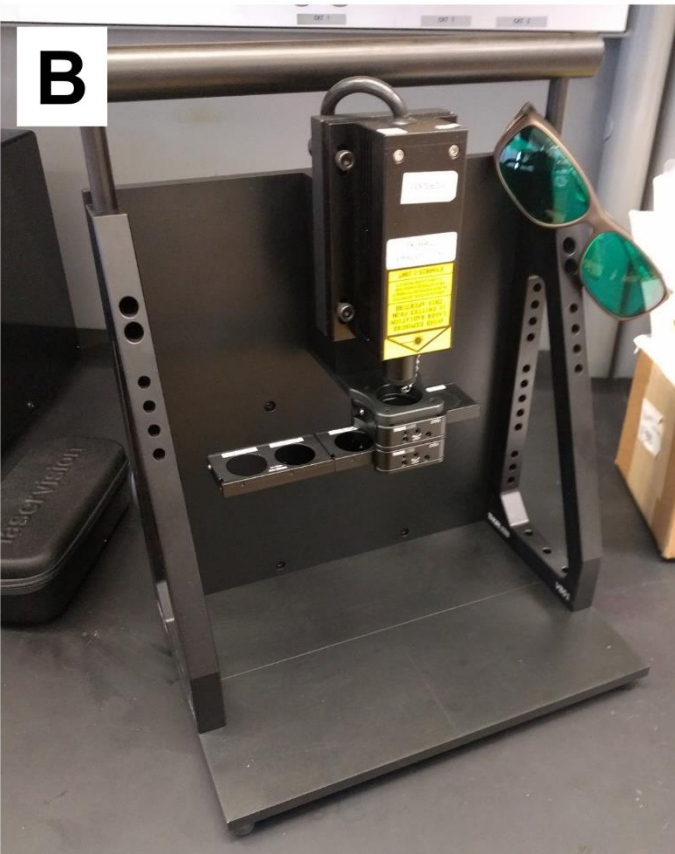

**C**

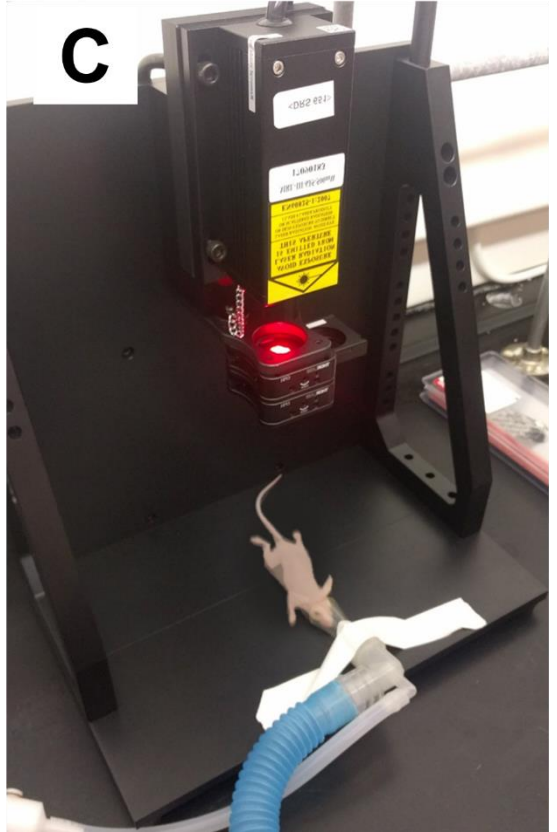

**Supplementary Figure 8.** Schematic set up for the photothermal ablation therapy: Computer-aided design (CAD) image of laser mount for photothermal ablative therapy (to scale with RTLMRL-635-500-5 Roithner Lasertechnik cw laser), with top, side, and front views (A). Image of complete setup (B). Image of laser setup with positioned mouse (C).

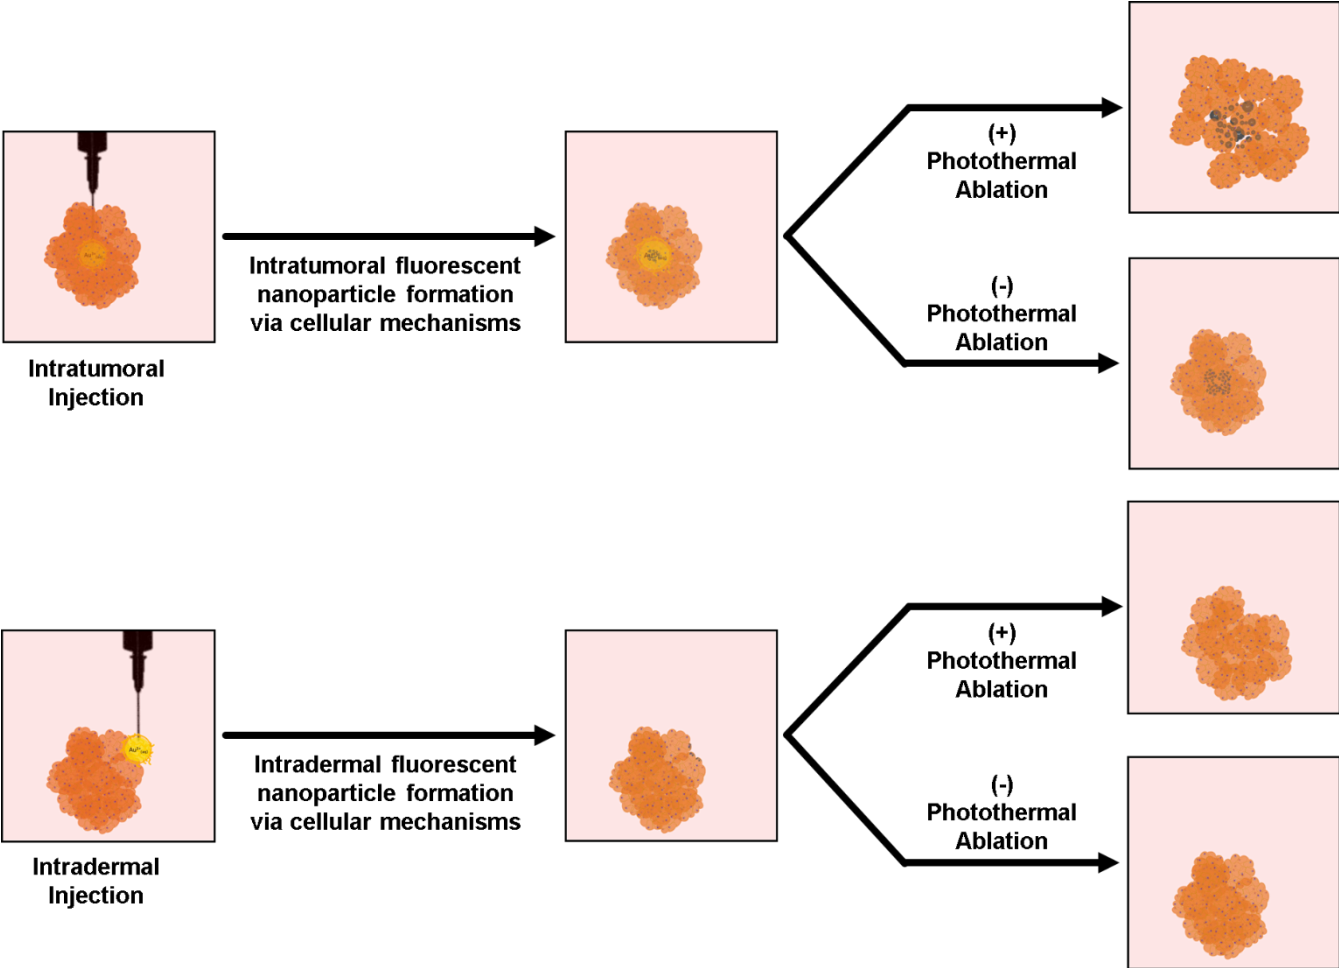

**Supplementary Figure 9.** Schematic diagram of nanoparticle formation: Artistic representation of how applications of ionic Au-PEG clusters will induce nanoparticle formation through successful intratumoral or intradermal applications with and without photothermal ablation.

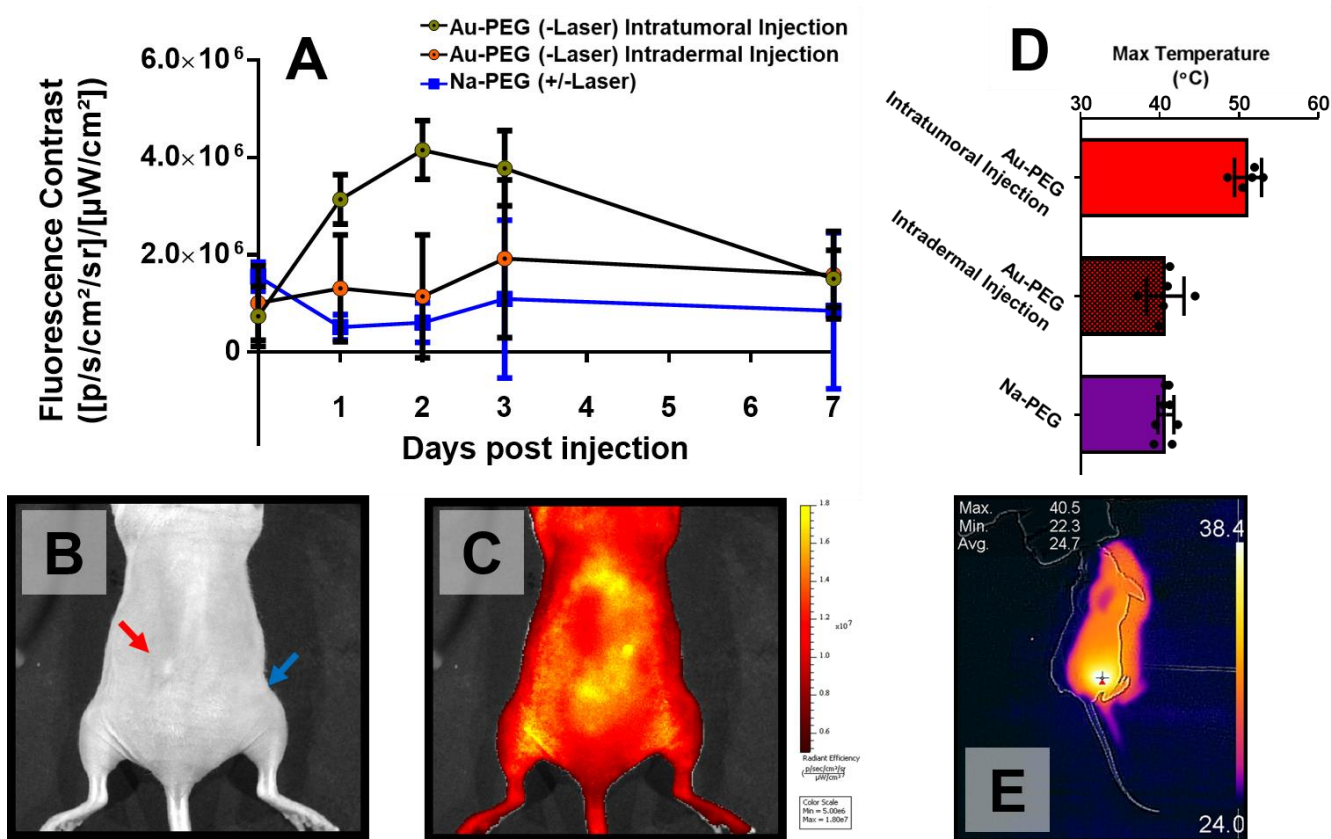

**Supplementary Figure 10.** *In vivo* efficacy of the intratumorally generated gold nanoparticles: (A) Fluorescence contrast afforded via IVIS imaging (430<sub>Ex</sub> 840<sub>Em</sub>) between on-site and off-site across one week period of treatments for Au-PEG with no photothermal treatment with intratumoral injections (Yellow), Au-PEG with intradermal injections (Orange), or Na-PEG (Blue). Error bars are standard deviation of the mean ( $n \geq 3$  biologically independent animals). \*The 1 day Au-PEG (-Laser) / Off site (Intradermal Injection) sample represents 2 biologically independent animals. Bright field (B) and fluorescence images (C) representative of mice with Au-PEG with intradermal injection (three days post injection) with arrows indicating injection sites for either Na-PEG (Blue) or Au-PEG (Red). Temperature maximums averaged across laser treatments (D) as determined through FLIR IR thermal imaging with representative thermal image of laser treatments made to mice with Au-PEG with intradermal injection (E). Error bars in for D are standard deviations of the mean ( $n \geq 5$  laser treatments).



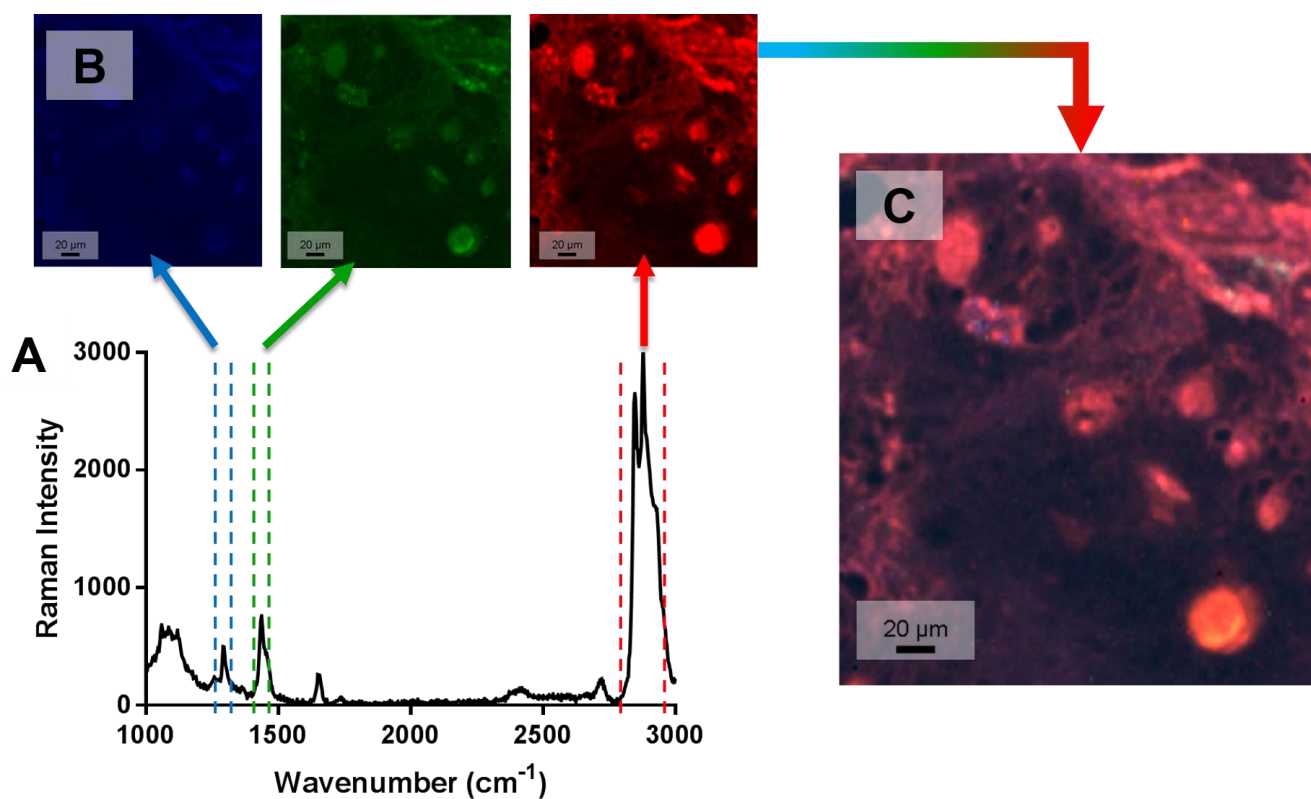

**Supplementary Figure 11.** Raman mapping of gold nanoparticles: Illustration of how peak intensities for regions 1250-1350, 1446-1477, and 2849-2969 cm<sup>-1</sup> (A) were used for generating Blue, Green, and Red color maps (B) and were then combined for Raman mapping of unstained histological sections (C).

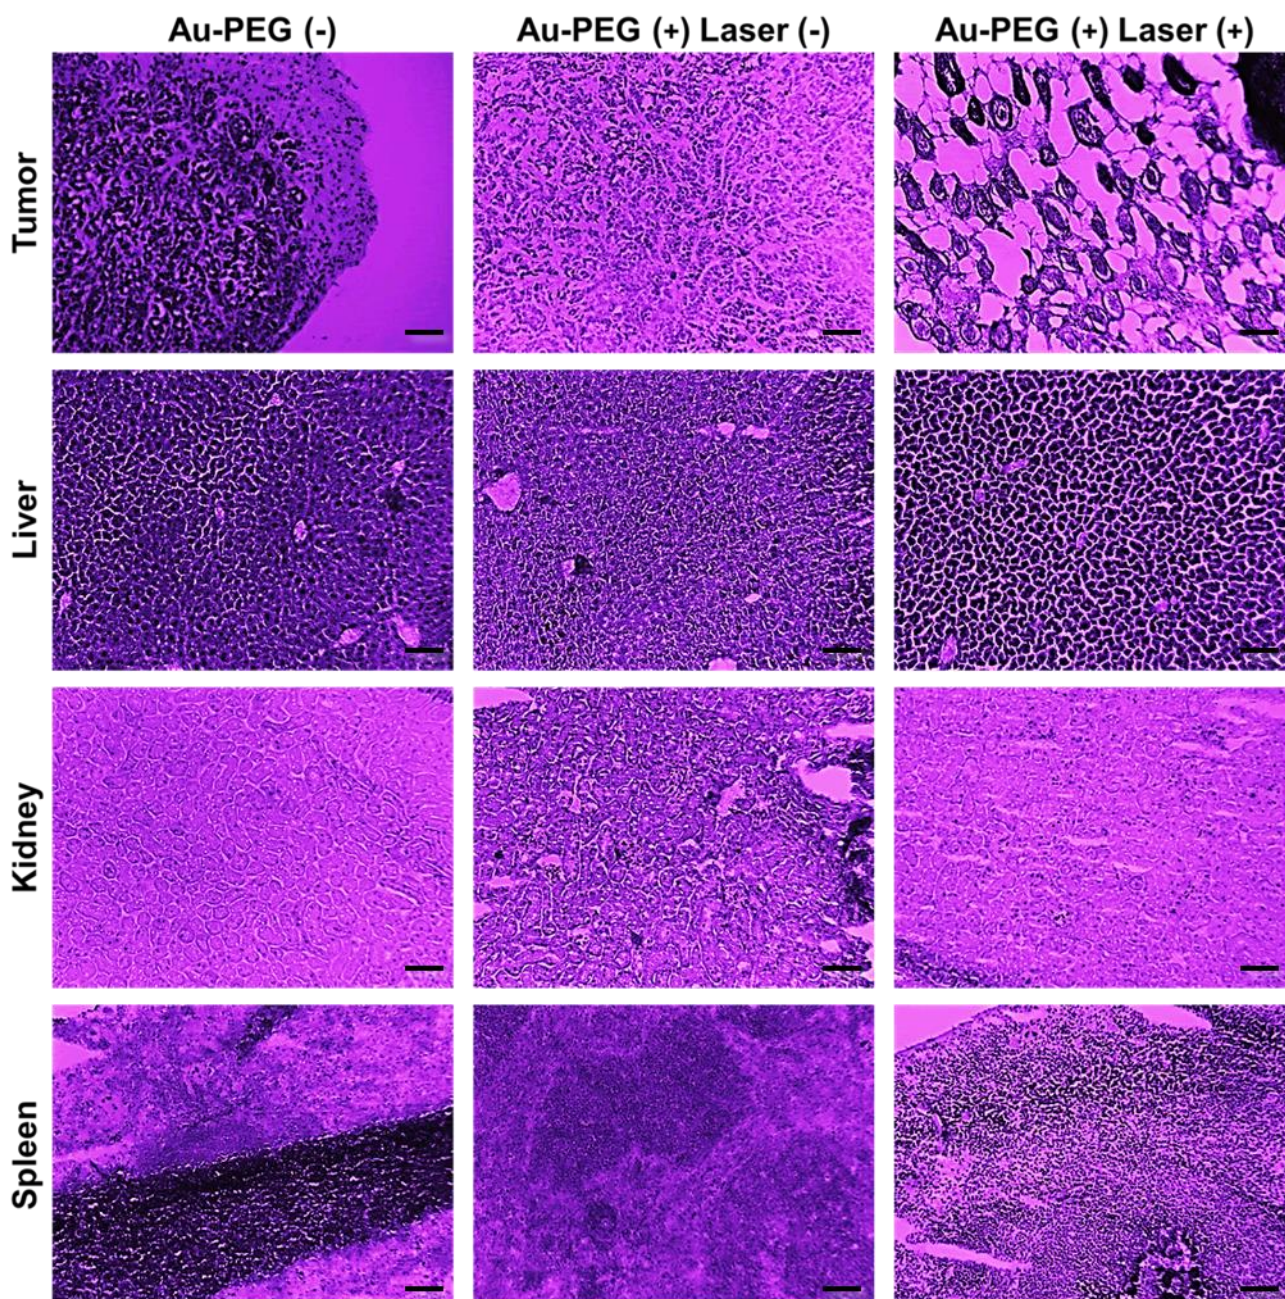

**Supplementary Figure 12.** Evaluating *in vivo* toxicity: Representative H&E stained tissue sections after microtomy from animals having received Au-PEG  $\pm$  and/or laser treatments  $\pm$  with Au-PEG. Scale bars are 100  $\mu$ m.

## Supplementary References.

1. Binder, J. X. *et al.* COMPARTMENTS: unification and visualization of protein subcellular localization evidence. *Database* **2014**, bau012-bau012 (2014).
2. Gaudet, P., Livstone, M. S., Lewis, S. E. & Thomas, P. D. Phylogenetic-based propagation of functional annotations within the Gene Ontology consortium. *Brief. Bioinform.* **12**, 449–62 (2011).
